# Supplementary material
Source: ML conference proceedings conference paper supplement (https://openreview.net/forum?id=iGDv1e4rFY)

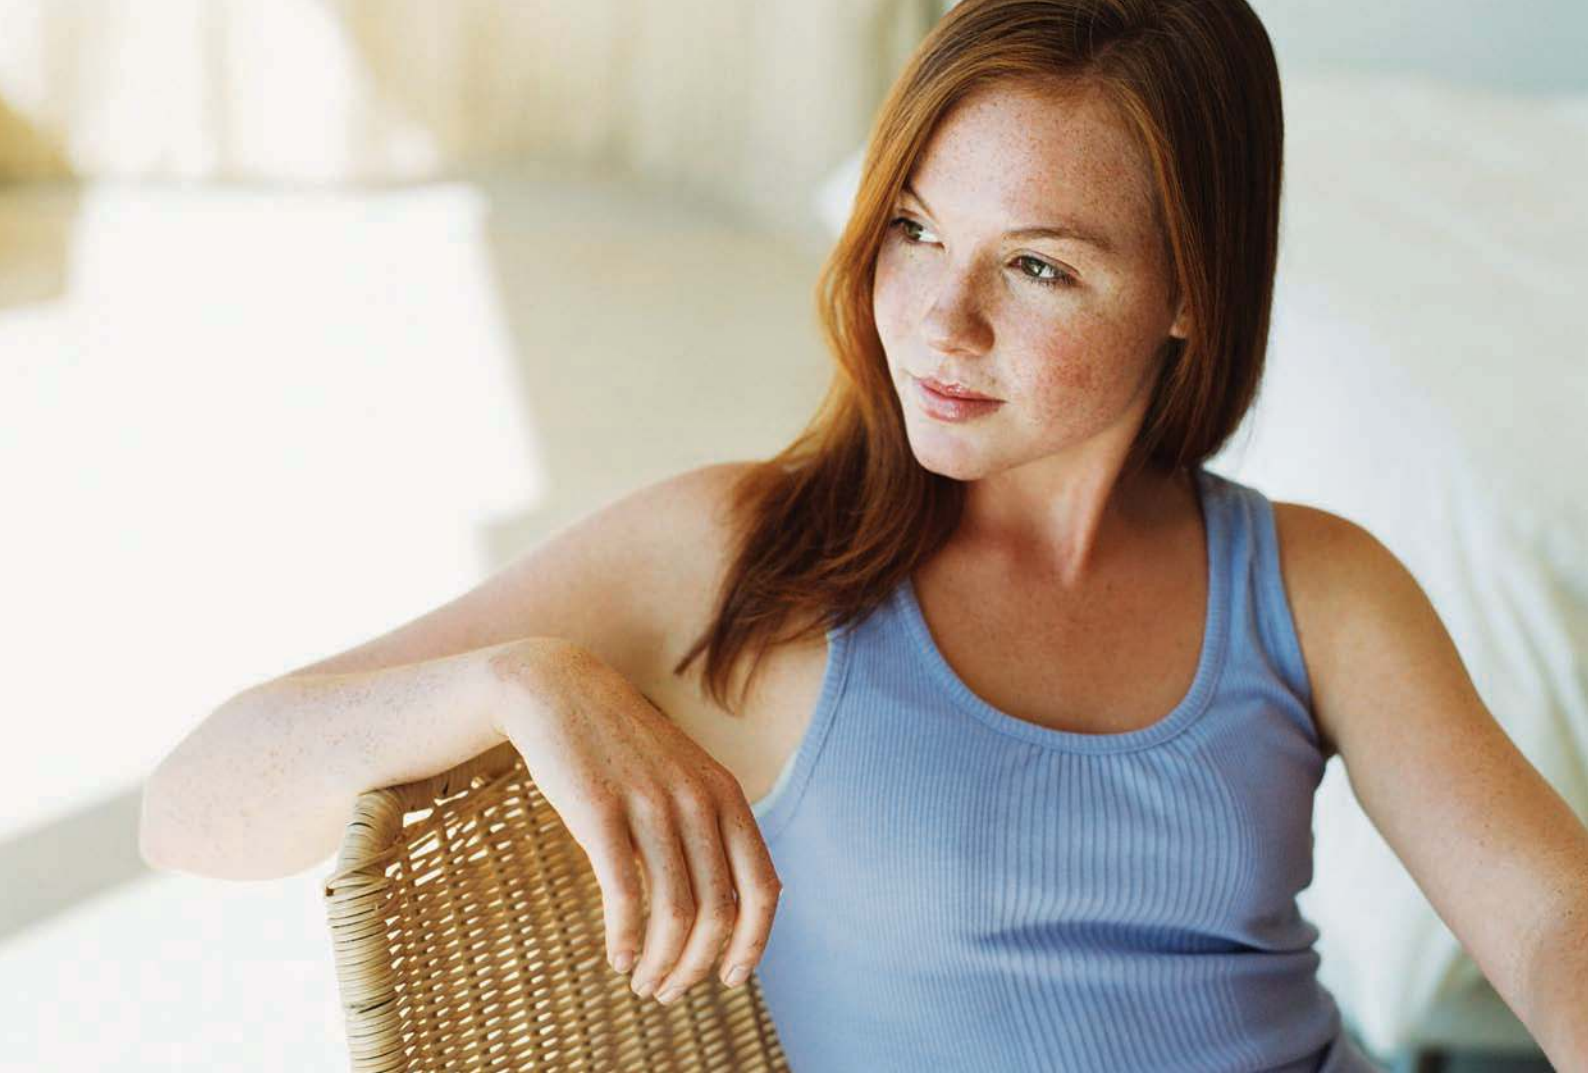

# BRINGING GLAZING to life

*Morley*

GLASS & GLAZING

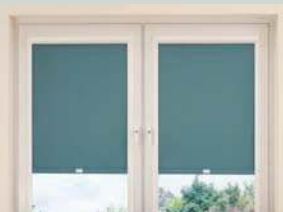

**PERFECT FIT<sup>®</sup> BLINDS**  
FOR EXISTING DOORS  
AND WINDOWS

in association with

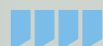

**LOUVOLITE**

**BRINGING  
GLAZING  
to life**

## ENHANCE YOUR HOME WITH A PERFECT FIT<sup>®</sup> BLIND

Roller and Pleated blinds for double glazed windows, doors and conservatories

These blinds are the most attractive and innovative window blinds available on the market today. The system is unique because the window blind fits neatly into a stylish frame, which moves together with the windows and doors when they are opened and closed giving you the perfect combination of shade and ventilation.

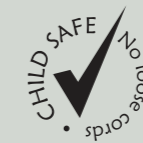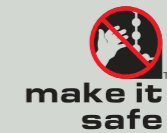

# PERFECTLY MATCHED WITH YOUR INTERIOR, TRANSFORMING YOUR LIVING SPACE

Perfect Fit® is a revolutionary system that enables window blinds to be fitted perfectly onto most double-glazed windows and doors, with no holes drilled into your upvc frame. The unique Perfect Fit® blind fits neatly onto the window and enhances your privacy because there are no gaps down the side of the blind. Whether you select a contemporary design for the living room, a blackout fabric for the bedroom or a moisture resistant print for the bathroom, our blind collection in combination with the Perfect Fit® system is the ultimate in style.

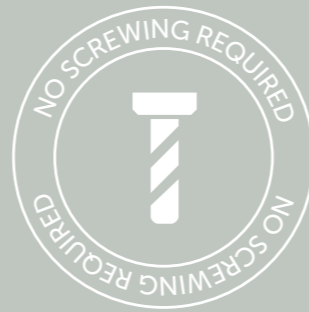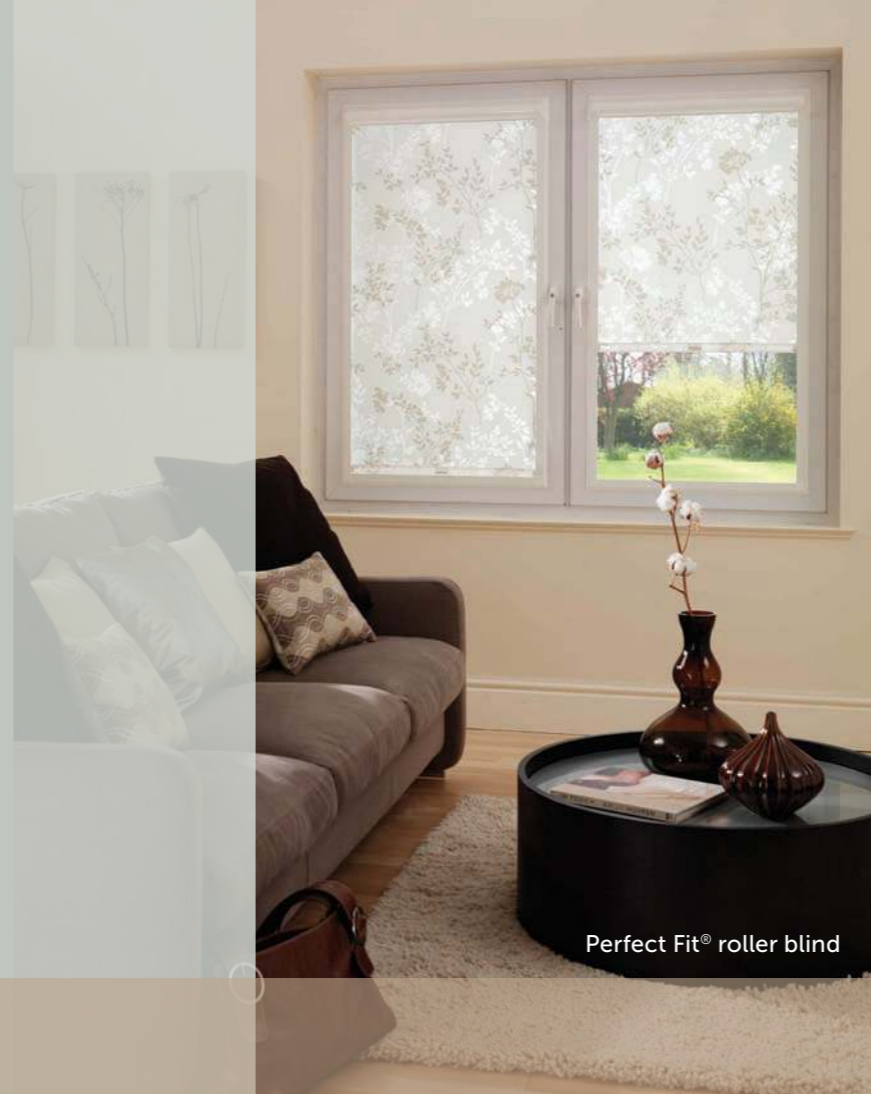

Perfect Fit® roller blind

## SEE THE BENEFITS

- A huge range of fabric colours and textures to match your interior design scheme
- No drilling or screwing into your window frames for a quick and clean installation
- Reduced gaps at the edge of the blinds increases your privacy
- Child safe because there are no loose cords or loops
- Leaves window sills clutter free
- Easily removable for cleaning

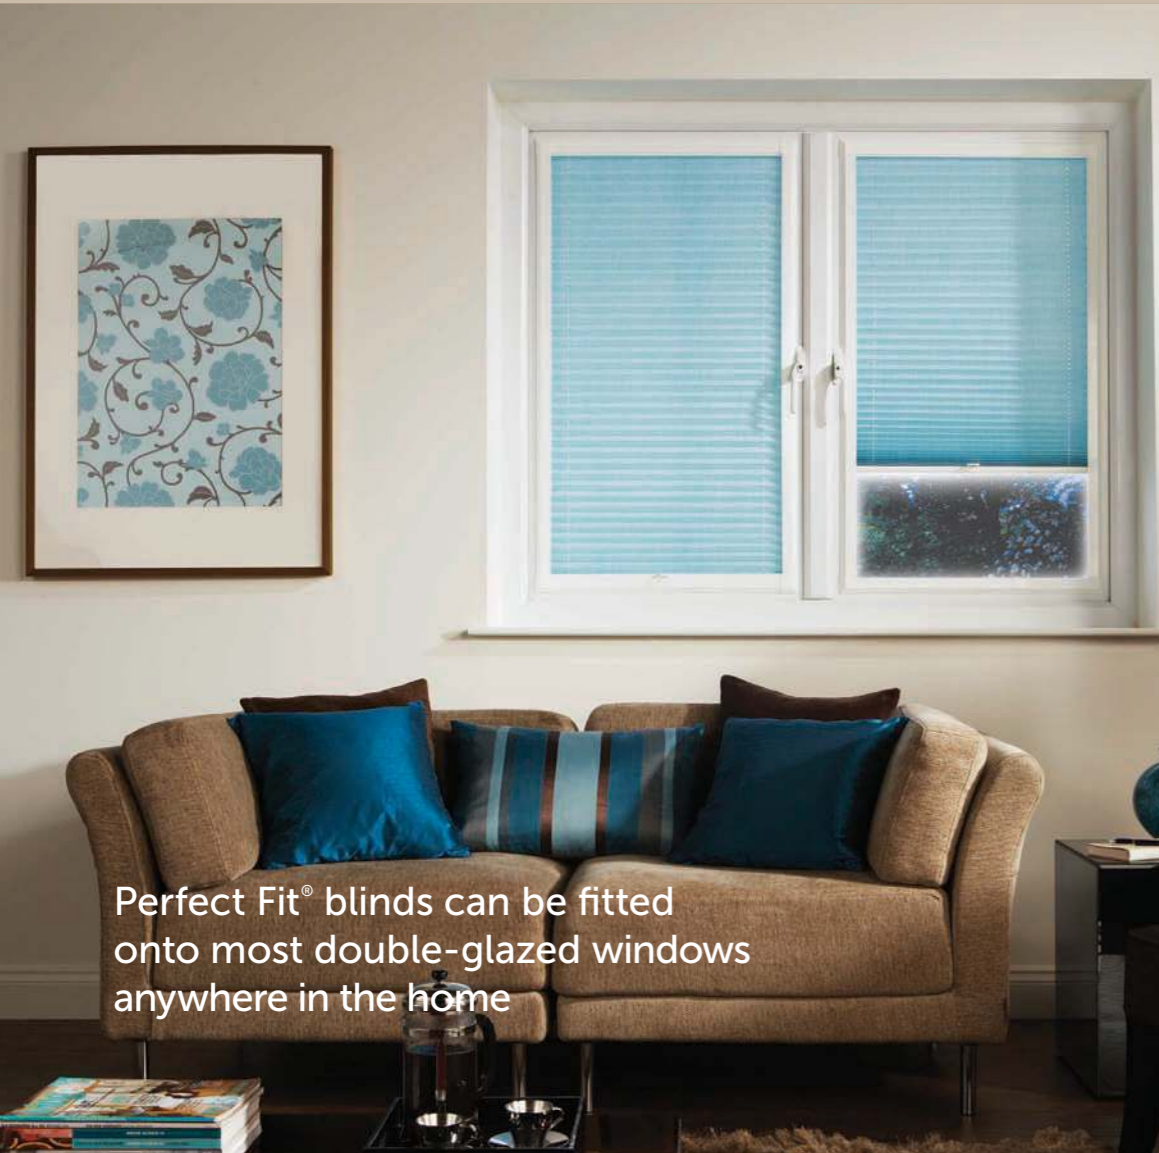

Perfect Fit® blinds can be fitted onto most double-glazed windows anywhere in the home

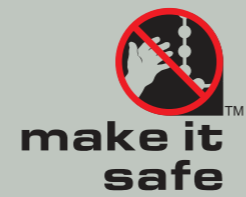

Perfect Fit® is a recognised child safe product in accordance with BBSA regulations

### Perfect for:

- Conservatory roofs
- Tilt and turn windows
- Doors / Bi-folding doors
- Push-out windows
- General windows
- Skylight / Rooflight windows

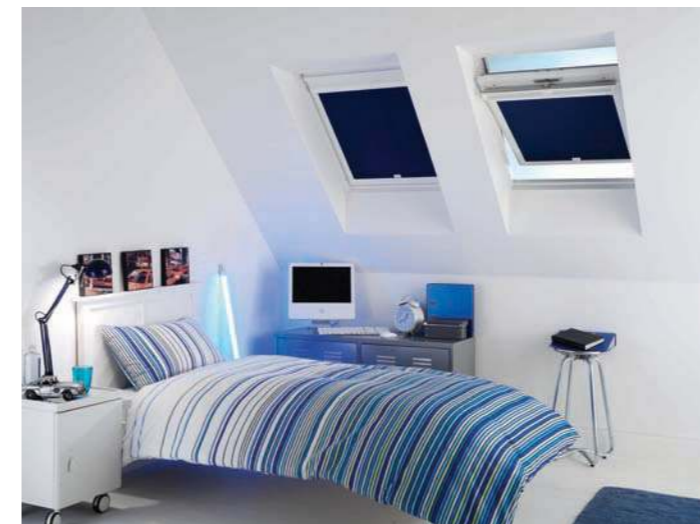

Blackout blinds for childrens rooms

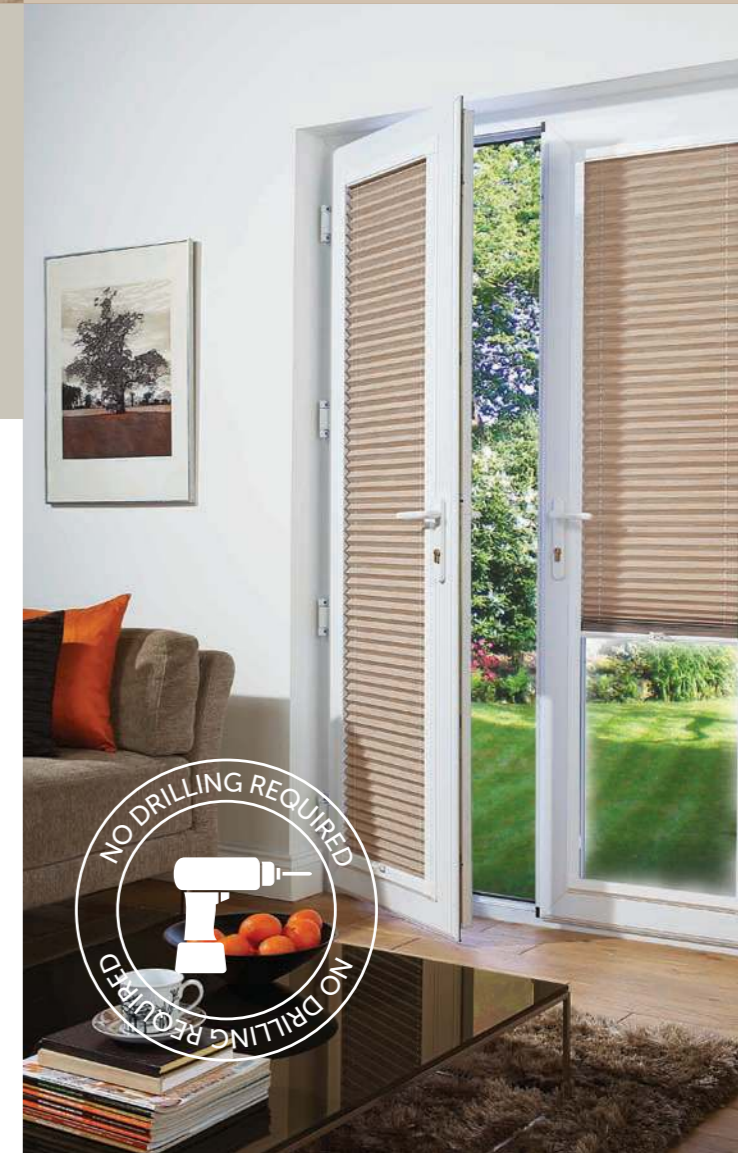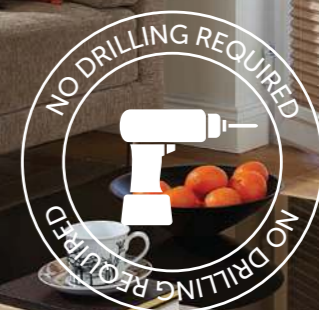

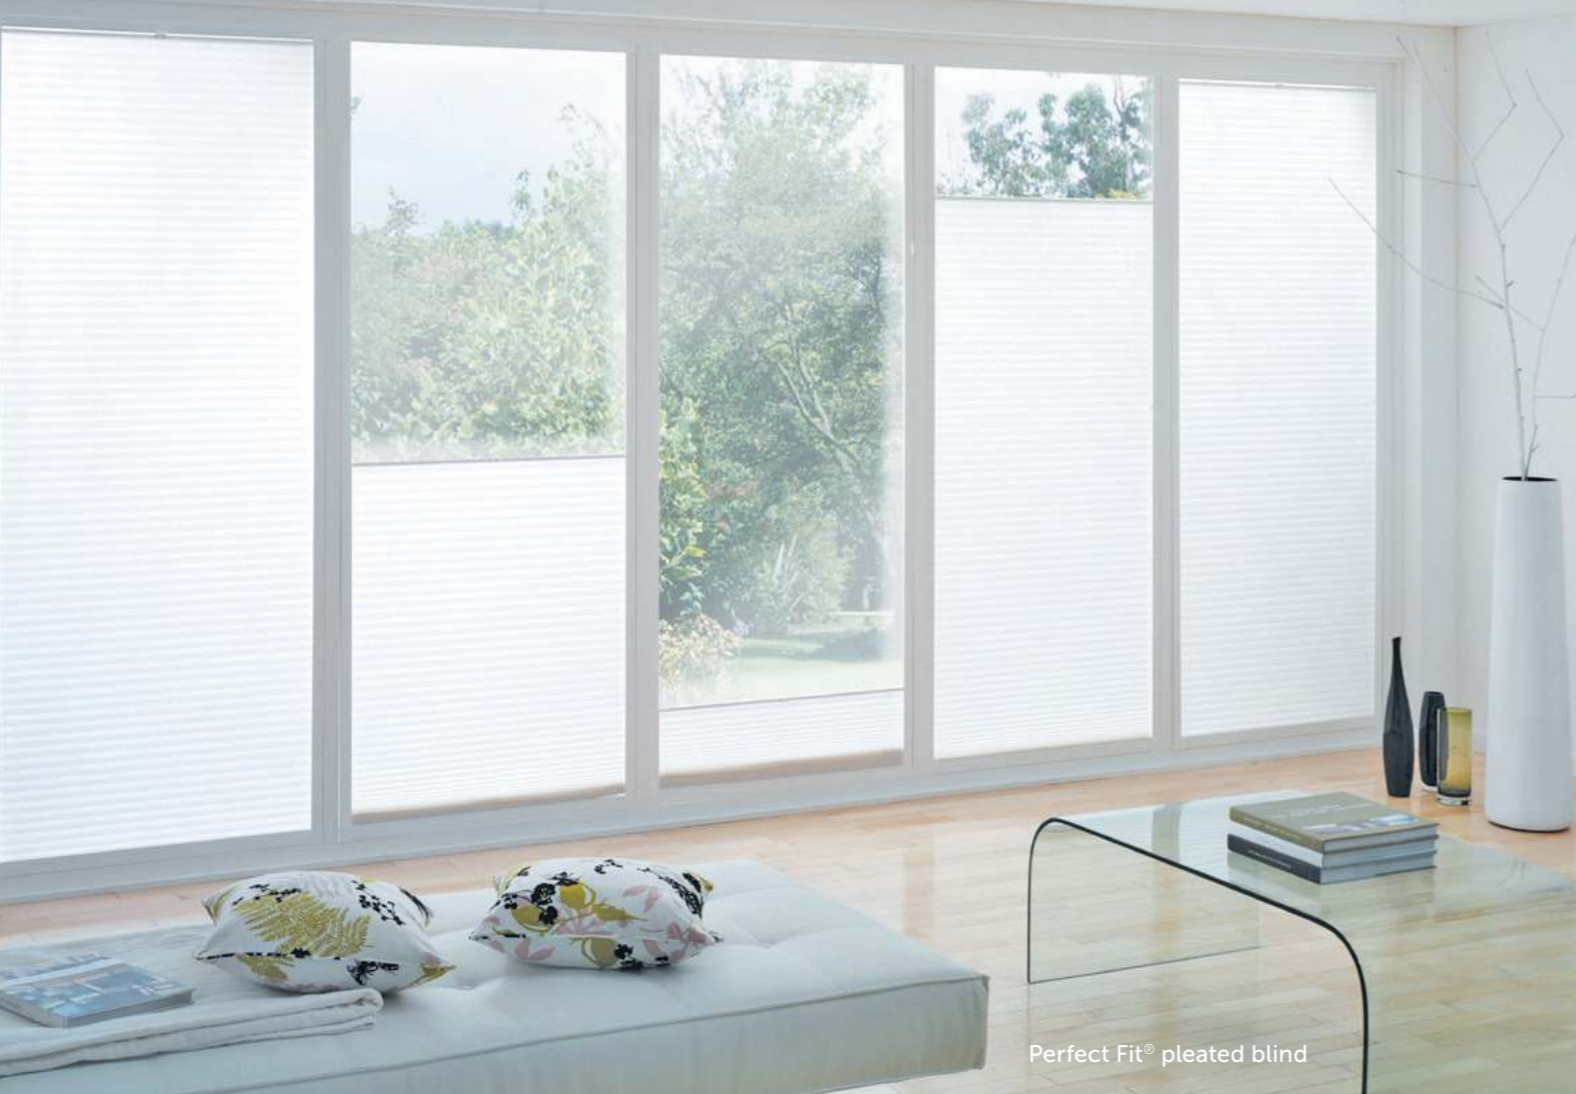

Perfect Fit® pleated blind

## Potential home energy savings using our fabrics

To further maximise the superb insulating qualities of the Perfect Fit® system, you can choose to have one of our energy efficient fabrics and save yourself up to 15% on your fuel bills by reducing the heat loss through winter.

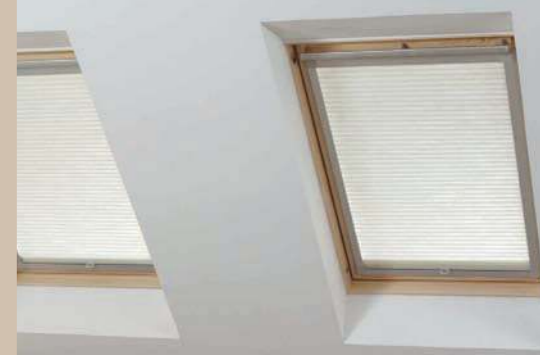

Excellent insulating properties

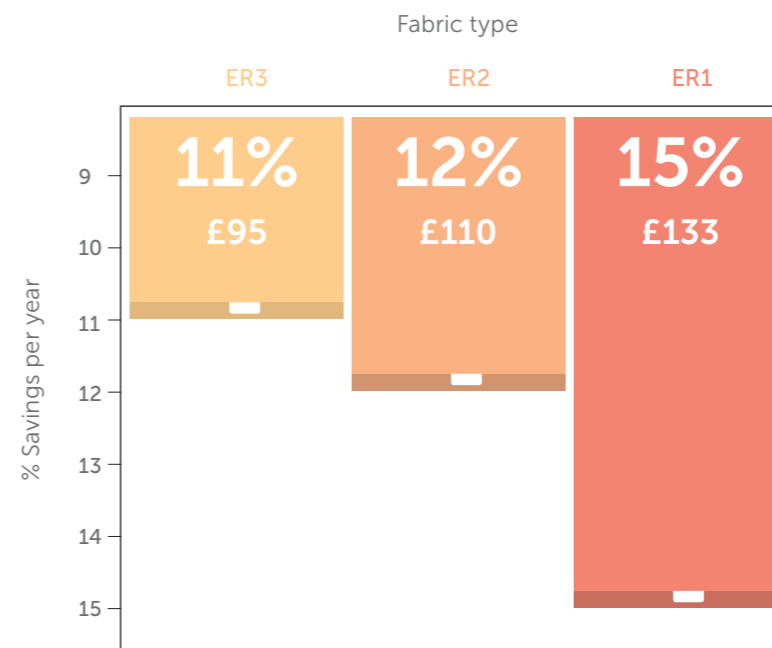

**ER1**

High level of insulation and energy savings of up to 15% per year\* can be achieved with these fabrics.

**ER2**

These fabrics provide a good level of insulation and energy savings of up to 12% per year\* can be achieved with these fabrics.

**ER3**

These are the essential fabrics for window furnishings and energy savings of up to 11% per year\* can be achieved with these fabrics.

AWARD WINNING

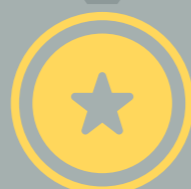

## REDUCE COSTS WITH OUR AWARD WINNING BLINDS

For the ultimate in style, the award winning Perfect Fit® blind is the only choice to make

One of the unique features of the Perfect Fit® frame is it's outstanding thermal efficiency. The frame fits flush against your window to help reduce heat build up in summer and retain heat in winter, in turn keeping your cooling and heating bills to a minimum!

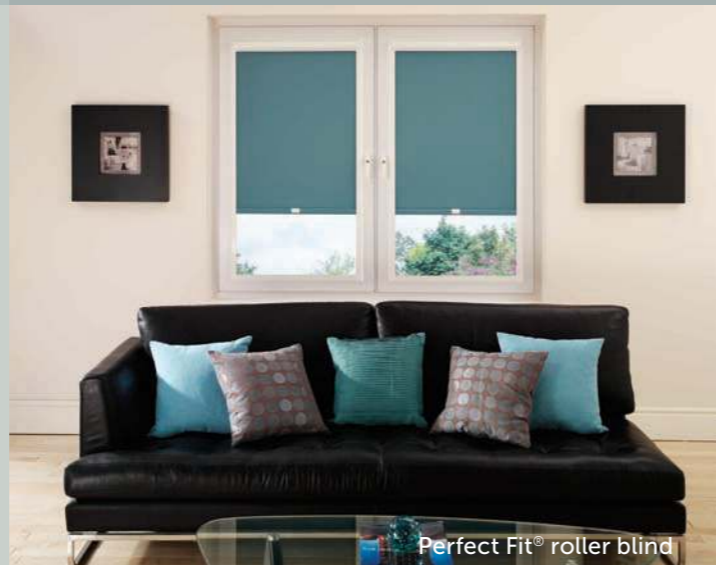

Perfect Fit® roller blind

Perfect Fit® roller blind

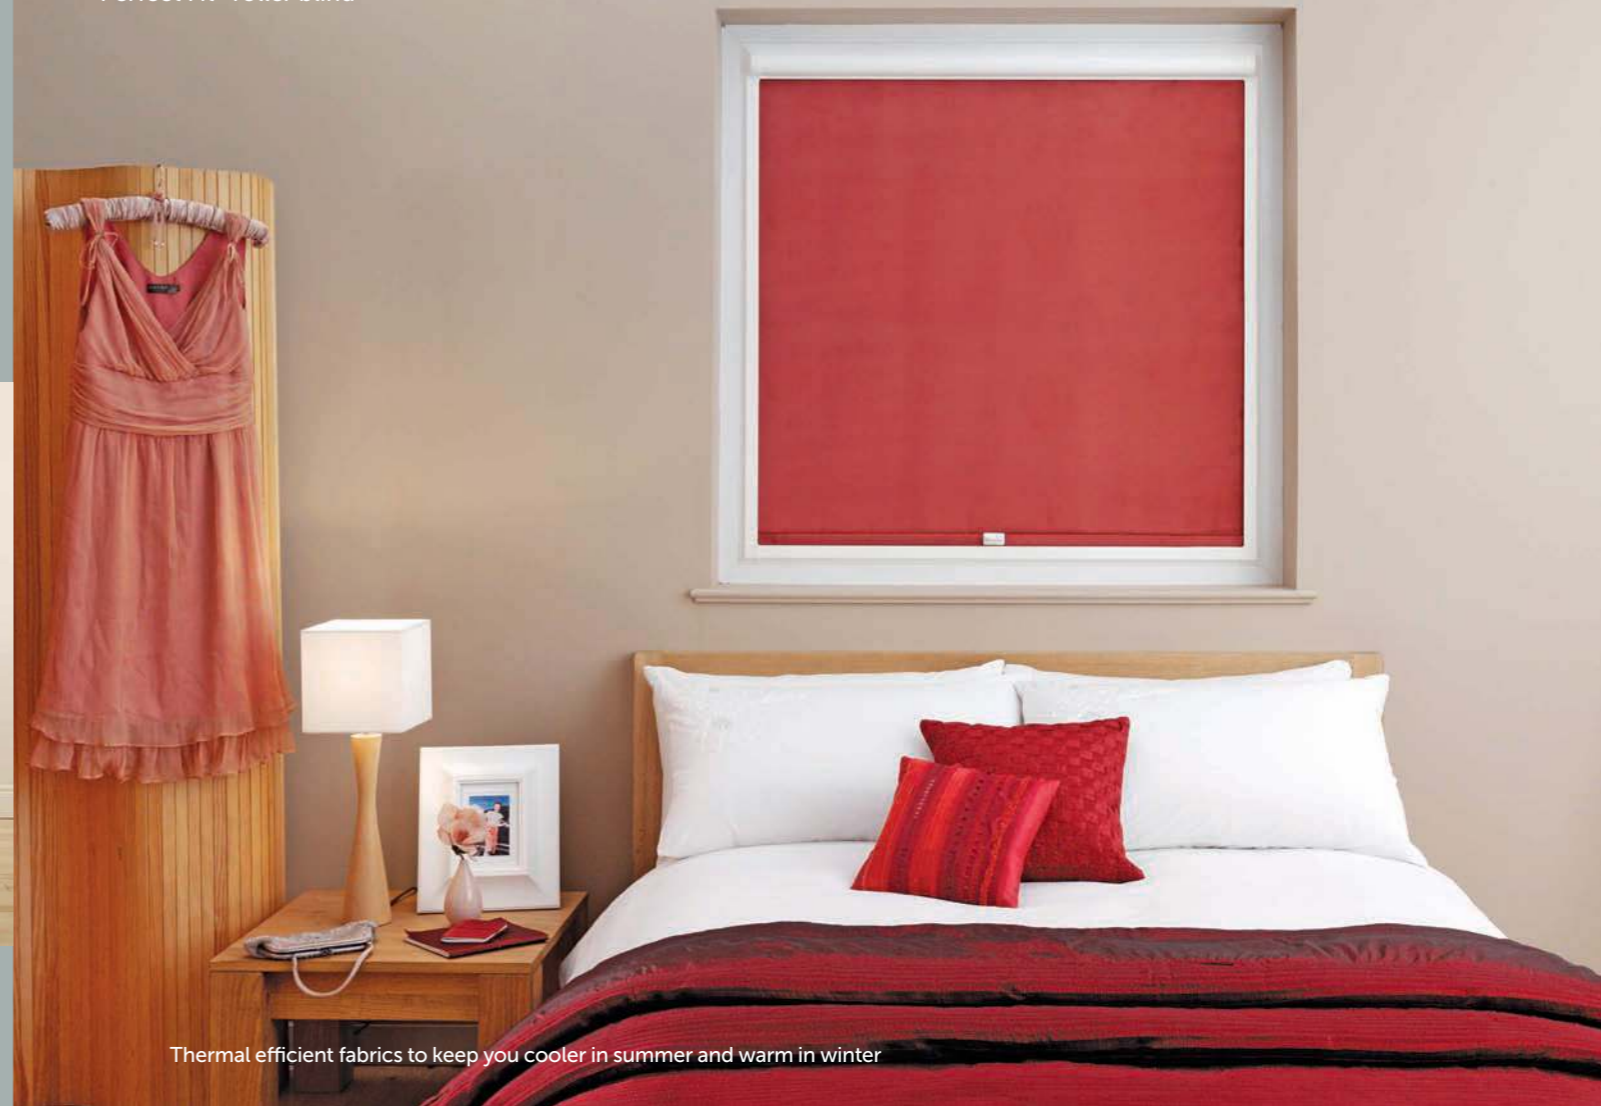

Thermal efficient fabrics to keep you cooler in summer and warm in winter

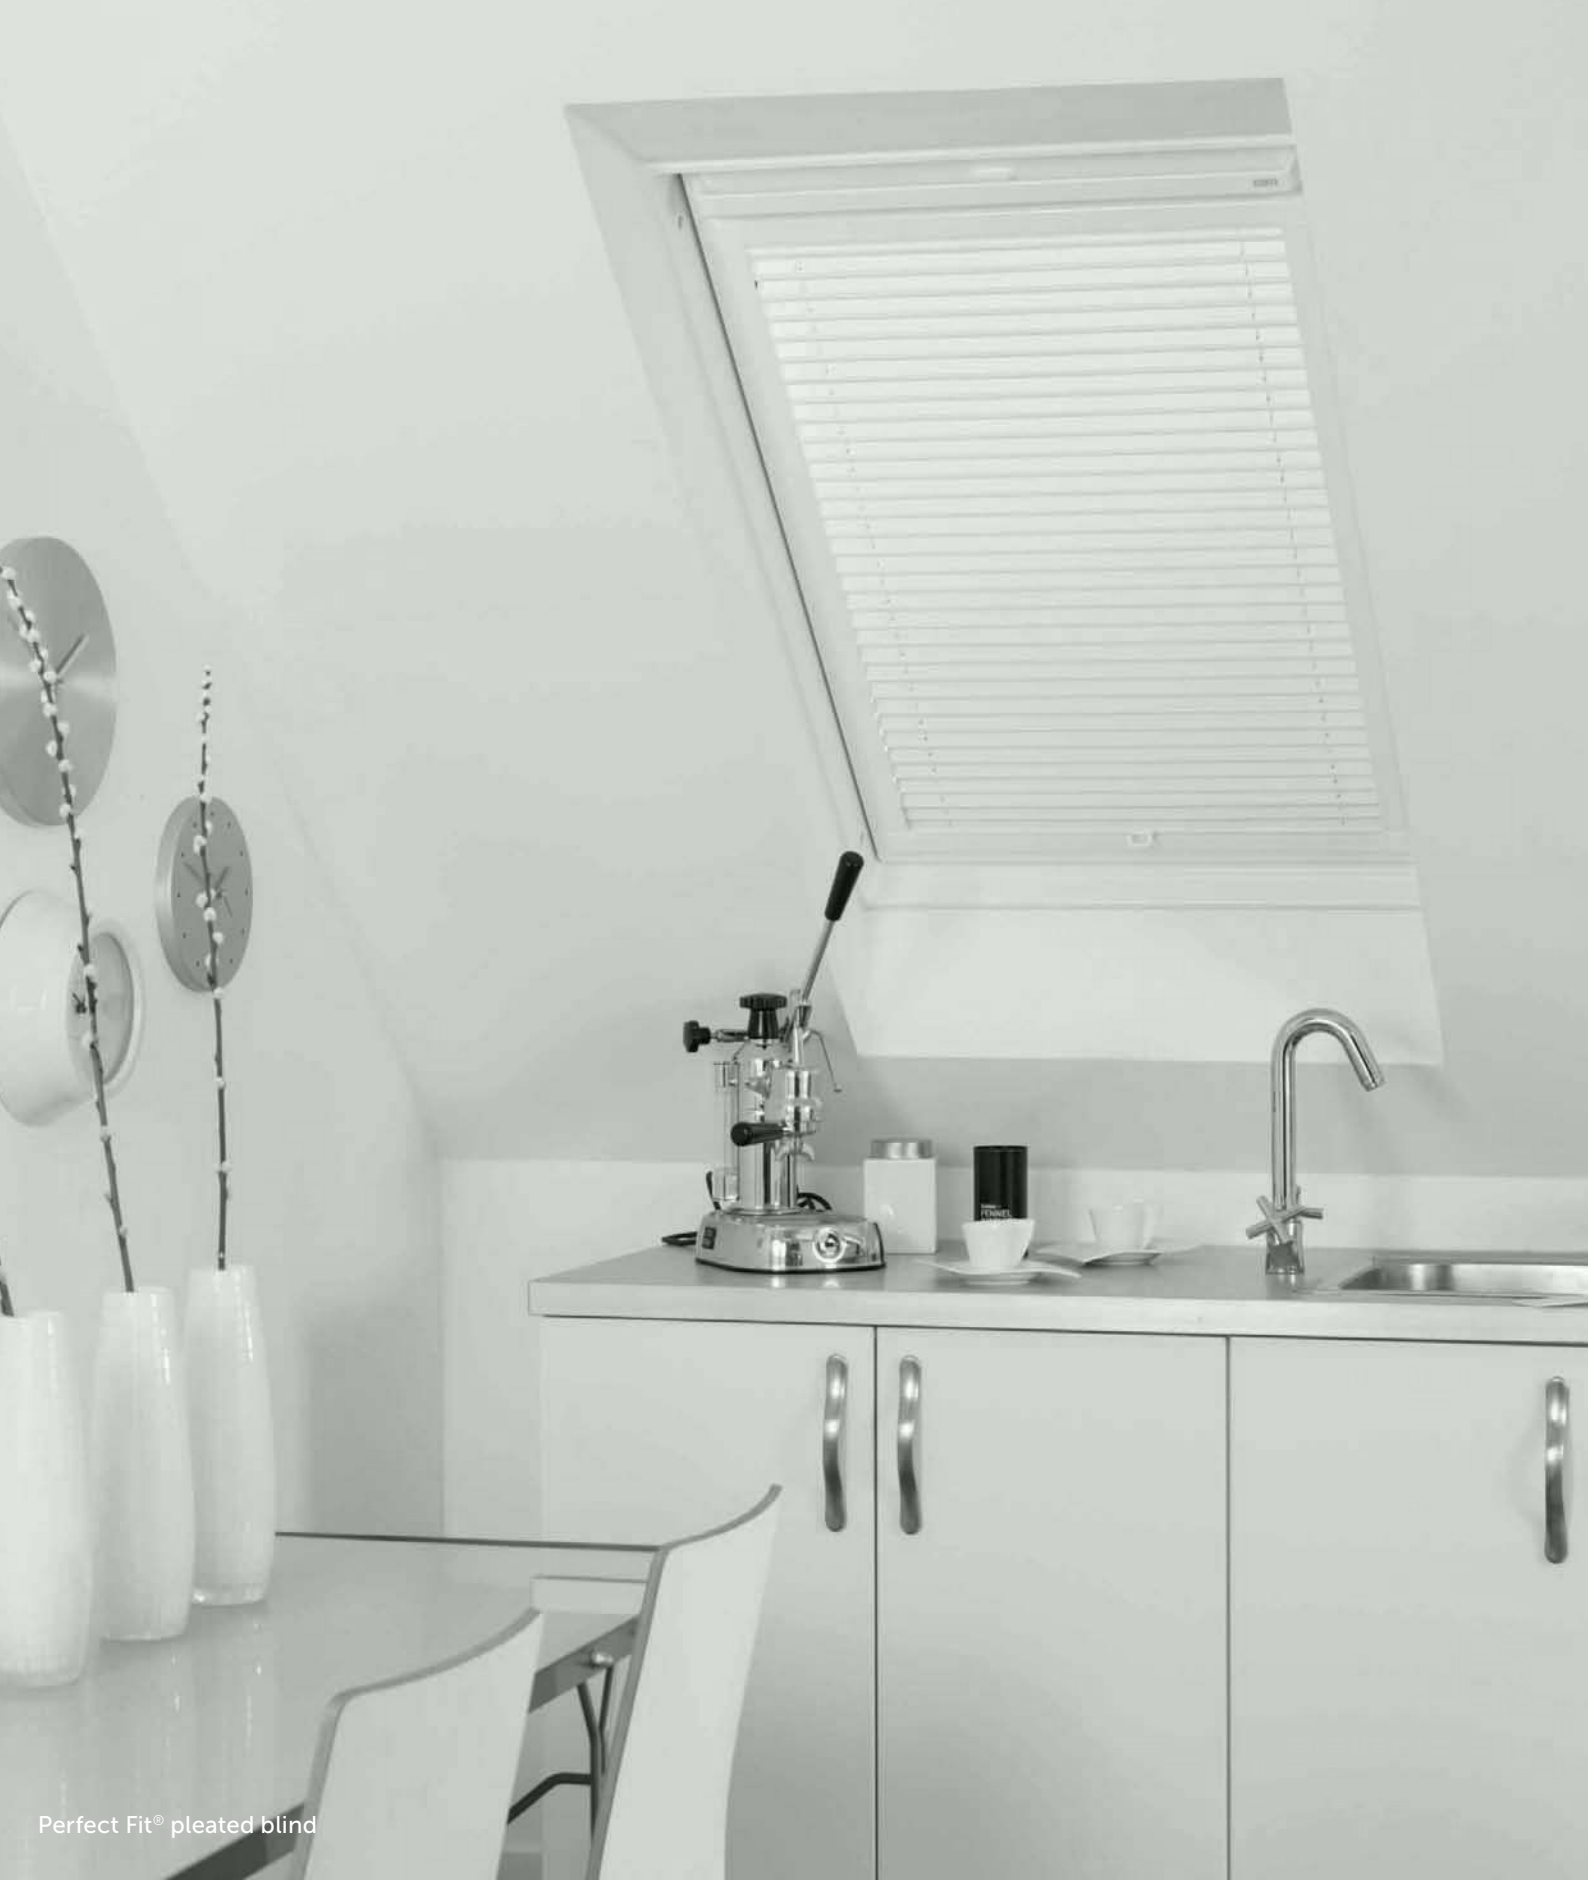

Perfect Fit® pleated blind

*Morley*

GLASS & GLAZING

T: 0113 277 8722 F: 0113 277 8723 [www.morleyglass.co.uk](http://www.morleyglass.co.uk) [info@morleyglass.co.uk](mailto:info@morleyglass.co.uk)

Morley Glass and Glazing Limited, Unit 27, Millshaw Park Industrial Estate,  
Millshaw Park Drive, Leeds LS11 0LU

All images and content © 2013 Morley Glass & Glazing and protected under UK and international law.  
All rights reserved. Reproduction by any means without prior permission is strictly forbidden.

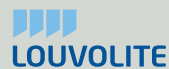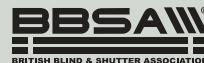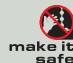

Supplement: supplementary_material [file full_pg4_pg5.pdf › submission/example-qa/example_4/chunk_0/full_pg4_pg5.pdf]
