# Supplementary material
Source: ML conference proceedings conference paper supplement (https://openreview.net/forum?id=iGDv1e4rFY)
Supplement: supplementary_material [file full_pg18_pg19.pdf › submission/example-qa/example_17/chunk_0/full_pg18_pg19.pdf]

# **SAMOSET COUNCIL UNIVERSITY OF SCOUTING**

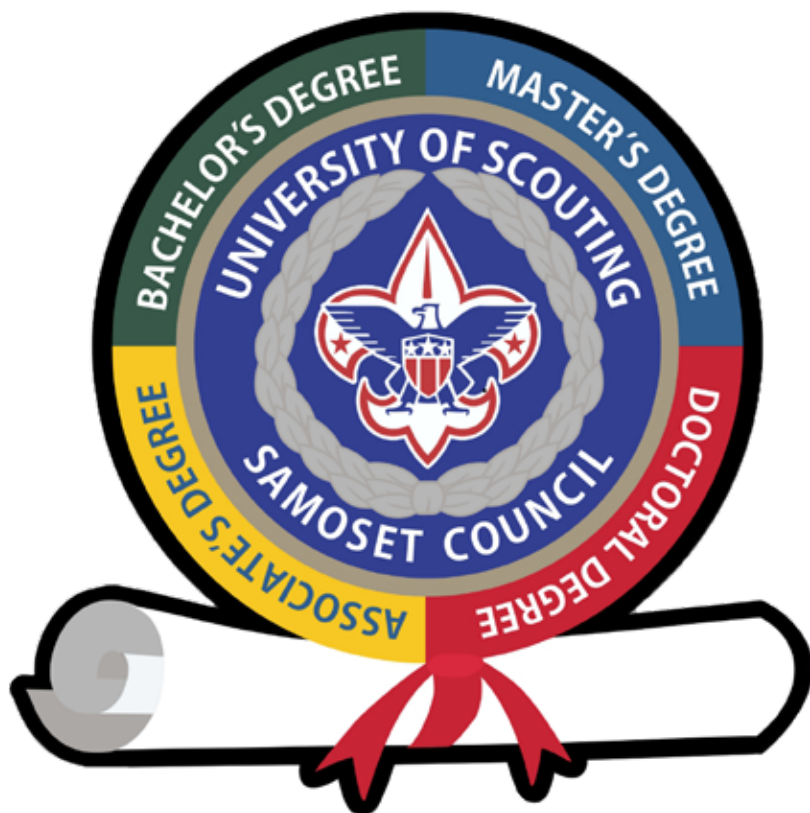

**Saturday, March 21**

John Muir Middle School  
1400 W. Stewart Avenue  
Wausau, WI

**2020 COURSE CATALOG**

# TABLE OF CONTENTS

---

Welcome & Introductions..... 3

Registration Information & Fees..... 3

Lunch ..... 4

Schedule ..... 4

Program Options..... 5

Degree Program Overview ..... 6

Degree Requirements ..... 6

Course List: Cub Scout Studies..... 8

Course List: Scouts BSA Studies ..... 10

Course List: Venturing Studies ..... 13

Course List: General Studies ..... 14

Course List: Youth Studies & Activities ..... 17

**Official Disclaimer:** *The University of Scouting Degree Program is not and should not be construed as being affiliated with or accepted by any accredited, private, state, or national educational system or course of study degree program. Samoset’s University of Scouting degree program is recognized by certain councils within the Boy Scouts of America where the council’s Scout Executives and/or training chairs choose to accept and give credit in their own council’s University of Scouting degree programs. The curriculum and degree program will be reviewed yearly and subject to change without notice.*

# WELCOME

---

Welcome to the Samoset Council University of Scouting! This is a program designed to offer a great deal of opportunities for everyone in the family. It is designed to develop leadership and personal skills for a more successful tomorrow. This program is open to anyone interested in learning more about the Scouting program, whether you are a first-year Scout or a seasoned adult Scouter.

Over 100 years ago, Lord Baden Powell had a vision of developing a Scouting program for youth. He soon learned that if the program was to ever succeed, he would need trained and dedicated adult leaders in the “arts and sciences” of Scouting. It’s from that idea that we offer you the “University of Scouting” covering Cub Scout Studies, Scouts BSA Studies, Venturing Studies, General Studies, Youth Activities, and Commissioner Sciences.

While the classes are organized within certain study areas, all classes are open to all participants (except some youth courses that are only open to youth). Please see the on-line registration page for more details.

If you have questions about the program, please feel free to contact me or one of the Deans.

- Dean of Cub Scout Studies ..... Kyle Firnstahl
- Dean of Scouts BSA Studies ..... Chris Donovan
- Dean of Venturing Studies..... Terri Franson
- Dean of General Studies..... Betsy Duginski
- Dean of Youth Studies ..... Kim Seehafer

Due to the limitations of the facility, we will limit most class sizes to 25 students. Please take time to review the Course Catalog and consider registering today. Once again, welcome to Samoset Council’s University of Scouting and on behalf of the thousands of Scouts in our council, thank you! Enjoy the day and take home what you learn to better the program for your Scouts.

Yours in Scouting,

Todd M. Gauerke  
Chancellor, Samoset Council University of Scouting  
(715) 389-1525

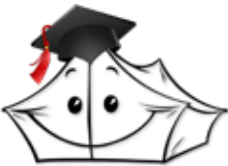

# REGISTRATION

---

Online registration opens in February and closes March 9. Participants who register prior to March 9 will receive an “early bird” discount. To register go to [www.samoset.org](http://www.samoset.org) and click on the University of Scouting icon. Most classes are limited to the first 25 students, so please consider registering early.

|               | Before March 9 | After March 10 |
|---------------|----------------|----------------|
| Adult tuition | \$14           | \$20           |
| Youth tuition | \$8            | \$10           |
| Lunch         | \$8            | \$10           |

# LUNCH

---

A hot lunch option is available. This will include chicken, mashed potatoes, baked beans, and a cookie. Iced tea and lemonade are also included. Hot lunch may not be available for walk-in registrants. Participants are also welcome to bring their own lunch.

# SCHEDULE OF EVENTS

---

| Time     | Activity     | Location      |
|----------|--------------|---------------|
| 7:00 AM  | Registration | Entrance area |
| 8:00 AM  | Session #1   | Classrooms    |
| 9:00 AM  | Session #2   | Classrooms    |
| 10:00 AM | Session #3   | Classrooms    |
| 11:00 AM | Session #4   | Classrooms    |
| 12:00 PM | Lunch        | Cafeteria     |
| 1:00 PM  | Session #5   | Classrooms    |
| 2:00 PM  | Session #6   | Classrooms    |
| 3:00 PM  | Session #7   | Classrooms    |
| 4:00 PM  | Departure    |               |

# PROGRAM OPTIONS

---

There are three (2) categories of registration for the University of Scouting program. Please choose the best approach for your personal needs.

## Youth Registration

- Available for all youth Scouts at a reduced rate.
- NOVA awards, merit badges, and other fun and educational courses.
- Every youth will receive a Smiley participation patch.

## Adult Degree Program

- Available for all adult Scouters.
- Fun and educational, locally designed courses to help leaders in their role.
- Four degrees available to earn: Associate's, Bachelor's, Master's, Doctorate.
- New students will receive a University of Scouting Degree patch.
- Qualified students will receive a diploma and degree ribbon.

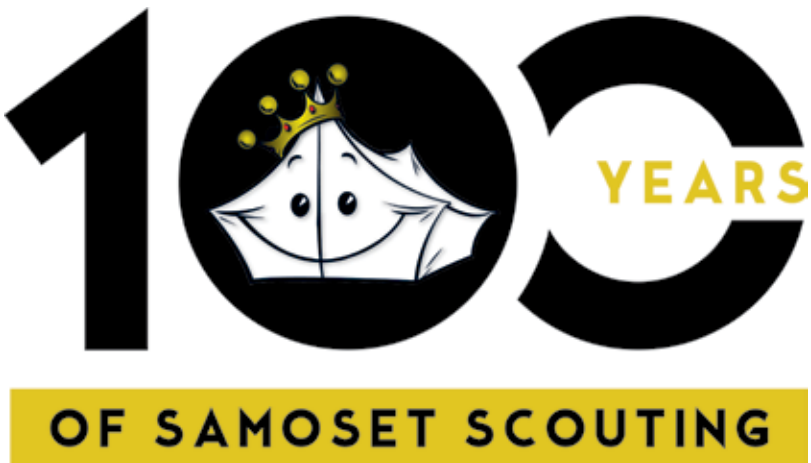

# DEGREE PROGRAM OVERVIEW

---

The Samoset Council University of Scouting (UoS) degree program is offered to adult Scouters interested in obtaining knowledge and skills to build and reinforce a top-notch Scouting program. Classes are designed as interactive learning opportunities developed and presented by experienced “Professors.” Participation in the degree program is on a voluntary basis and adherence to the degree requirements are the responsibility of the “student.”

## Credits

A credit is designated as one instruction session out of the seven instruction sessions provided throughout the day. For a class that is scheduled for more than one session block, credit will be given as 1 times the number of sessions. A class that requires 2 instructional sessions = 2 credits, and a class that is 3 sessions = 3 credits. A credit is earned by fully participating in any class within any qualified study. For established BSA courses, instructors will earn 1 credit for every 1 hour of instruction. Instructors will earn 3 credits for developing and instructing an approved class within the qualified study. Individuals serving as Dean or Chancellor will earn 6 credits.

## Transfer of Credits

Candidates who would like to transfer credits from another University of Scouting program into Samoset Council’s program must provide documentation of attendance, including a list of courses and dates attended. Documentation should be on Council letterhead from the Scout Executive, District Executive, or Council Training Chair. The candidate’s documentation will be reviewed by the University of Scouting Degree board for placement into the Degree Program at a commensurate level.

# DEGREE REQUIREMENTS

---

## Associate’s Degree

1. It is recommended that you are fully trained in your registered leader position.
2. Enroll in the University of Scouting Associates Degree program.
3. Complete 6 credits as an Associate’s degree candidate.

## Bachelor’s Degree

1. It is recommended that you are fully trained in your registered leader position.
2. Hold an Associate’s degree prior to registering for classes.
3. Enroll in the University of Scouting Bachelor’s Degree program.
4. Complete a minimum of 6 credits as a Bachelor’s degree candidate.
5. It is recommended you attend the Master’s pre-requisite session “GS027: Earning an Advanced Degree.”

# DEGREE REQUIREMENTS

---

## Master's Degree

Pre-requisite: Complete "GS027: Earning an Advanced Degree" session.

1. Be fully trained in your registered leader position.
2. Hold a Bachelor's degree prior to registering for classes.
3. Enroll in the University of Scouting Master's Degree program and teach a qualified session the University of Scouting that year.
4. Complete a minimum of three credits as a Master's degree candidate (in addition to the three earned for teaching a course).
5. With agreement from your advisor, complete ONE of the following:
  - Teach BSA training at a district or council training event approved by your advisor (in addition to requirement #3)
  - Attend Wood Badge
  - Attend Powder Horn

## Doctoral Degree

1. Be fully trained in your registered leader position.
2. Hold a Master's Degree prior to registering for classes.
3. Enroll in the University of Scouting Doctoral Degree program.
4. Complete a minimum of three credits as a doctoral candidate.
5. With agreement from your advisor, complete ONE of the following:
  - Staff a council leadership training course (such as Wood Badge or NYLT).
  - Actively serve on the council training committee for a full year.
  - Serve in the role as University of Scouting Dean or Chancellor.
  - Staff a national training course (such as Philmont Training Center or National Camp School, WB/NYLT/PH Course Dir. Conf.).
  - Staff and teach a national training event (such as a National Jamboree, OA National Leadership Seminar, or OA National Order of the Arrow Conference).

# CUB SCOUT STUDIES

| Course | Description                                                                                                                                                                                                                                                           | 8:00 | 9:00 | 10:00 | 11:00 | 1:00 | 2:00 | 3:00 |
|--------|-----------------------------------------------------------------------------------------------------------------------------------------------------------------------------------------------------------------------------------------------------------------------|------|------|-------|-------|------|------|------|
| CS-021 | <b>Ouch, That Hurts! Cub Scout First Aid</b><br>An opportunity for leaders to learn first aid skills appropriate to teach Cub Scouts.                                                                                                                                 |      |      |       |       |      |      |      |
| CS-009 | <b>Finish Strong: A Guide To Blue And Gold Banquets</b><br>The birthday of Scouting is an important event in the Cub Scout year. Learn how to plan a fun and successful event while gathering ideas for entertainment, decorations, advancement ceremonies, and more. |      |      |       |       |      |      |      |
| CS-002 | <b>Tricks Of The Trade: Keeping A Den Meeting Interesting</b><br>Learn how to keep things fun and spark creativity while working towards advancement and building teamwork.                                                                                           |      |      |       |       |      |      |      |
| CS-010 | <b>Getting Crafty: Craft Ideas For Cub Scouts</b><br>Craft projects can be an important part of a den meeting. Gather ideas for fun craft projects that you can offer at your den meetings. It's time to be creative!                                                 |      |      |       |       |      |      |      |
| CS-001 | <b>You're Not Alone - Resources for Den Leaders</b><br>Tips and Tricks for Den Leaders.                                                                                                                                                                               |      |      |       |       |      |      |      |
| CS-007 | <b>The Webelos-to-Scouts BSA Transition</b><br>Assist your Webelos parents with one of the most important transition in their youth's scouting experience.                                                                                                            |      |      |       |       |      |      |      |
| CS-011 | <b>Pinewood Derby 101</b><br>Learn how to run a fund Pinewood Derby where every Scout feels like a winner. Learn about the parts of the track and how to setup a race.                                                                                                |      |      |       |       |      |      |      |
| CS-019 | <b>Need A Hand? Creating A Pack Handbook</b><br>A pack handbook can be one of the most useful tools in your arsenal. Learn what items to include in the handbook, as well as how to educate new parents in it use.                                                    |      |      |       |       |      |      |      |
| CS-005 | <b>How To Effectively Use A Den Chief</b><br>Learn the role of a den chief and how to utilize the position to improve den functions.                                                                                                                                  |      |      |       |       |      |      |      |

# CUB SCOUT STUDIES

| Course | Description                                                                                                                                                                                                                                                                                                                   | 8:00 | 9:00 | 10:00 | 11:00 | 1:00 | 2:00 | 3:00 |
|--------|-------------------------------------------------------------------------------------------------------------------------------------------------------------------------------------------------------------------------------------------------------------------------------------------------------------------------------|------|------|-------|-------|------|------|------|
| CS-016 | <b>A Guide to Geoscouting (Geocaching)</b><br>An introduction to global position system (GPS) technology and geocaching - learn how to develop related activities which promote fun as well as the goals of Scouting. Please bring along appropriate outdoor clothing, we may go outside to test out some apps and equipment. |      |      |       |       |      |      |      |
| CS-013 | <b>Songs And Skits For Cub Scouts</b><br>Get your singing voices ready! Learn how songs and skits can enhance your den or pack meeting, and get ideas for how to make meetings more fun for you and the boys.                                                                                                                 |      |      |       |       |      |      |      |
| CS-014 | <b>Building A Summer Cub Scout Program</b><br>Learn how to put together fun events during the summer months to keep your Scouts involved and active. Get ideas for places to go, and how to safely get there. Keeping the boys active in the summer will bring them back in the fall!                                         |      |      |       |       |      |      |      |
| CS-003 | <b>It's KNOT Just For Boy Scouts</b><br>Why not teach Cub Scouts about things they will need for Scouts BSA, so they are more prepared? Knots, knife safety, fire building, and cooking are fun for the boys and the adults.                                                                                                  |      |      |       |       |      |      |      |
| CS-004 | <b>Fun, Fun, Fun! Pack Meeting Activities</b><br>Keep pack meetings exciting for both boys and parents through the use of derbies (pinewood, space and rain gutter regattas), as well as rocktona and Scout-mobile races to keep the boys involved. They may even tell a friend!                                              |      |      |       |       |      |      |      |

# SCOUTS BSA STUDIES

| Course | Description                                                                                                                                                                                                                                                                                                                                                                              | 8:00 | 9:00 | 10:00 | 11:00 | 1:00 | 2:00 | 3:00 |
|--------|------------------------------------------------------------------------------------------------------------------------------------------------------------------------------------------------------------------------------------------------------------------------------------------------------------------------------------------------------------------------------------------|------|------|-------|-------|------|------|------|
| BS-029 | <b>Introduction To Youth Leadership Skills For Adult Leaders (2 Hrs)</b><br>The BSA has optimized a method to teach leadership skills to youth in your troop. This course will introduce the syllabus and help you understand the presentation method so you can inspire the next generation of youth leaders.                                                                           |      |      |       |       |      |      |      |
| BS-059 | <b>Scoutmaster Specific Training</b><br>For all Scoutmasters and their assistants, this course introduces leaders to the basics of operating a troop. It includes troop organization, the patrol method, leadership, advancement, and program planning.                                                                                                                                  |      |      |       |       |      |      |      |
| BS-065 | <b>Making Merit Badges Happen</b><br>Thinking about setting up a Merit Badge for some of your Scouts? Why not make it available to Scouts from across Samoset, and introduce your Scouts to some new friends all at the same time. Learn how to organize a successful merit badge clinic and learn about some awesome opportunities outside of Samoset Council.                          |      |      |       |       |      |      |      |
| BS-043 | <b>Order of the Arrow Opportunities</b><br>The Order of the Arrow (OA) is the National Honor Society of the Boy Scouts of America. Learn about the OA and how to get your Scouts involved.                                                                                                                                                                                               |      |      |       |       |      |      |      |
| BS-060 | <b>Backpacking Trails in Wisconsin</b><br>Have you ever heard one of your Scouts say..."Scouting is boring"? Well, challenge them with a backpacking trip and watch their engagement levels reach historic levels. Learn about some awesome spots here in Samoset Council. From easy 3 hour introduction hikes to full weekend hikes, come figure out how to get your Troop backpacking. |      |      |       |       |      |      |      |
| BS-055 | <b>Getting ready for Summer Camp</b><br>Learn what it takes to get ready for summer camp at Tesomas. We'll cover all the administrative details, along with some tools and techniques to make sure your Scouts are excited and ready to take advantage of all the opportunities Camp Tesomas has to offer.                                                                               |      |      |       |       |      |      |      |

# SCOUTS BSA STUDIES

| Course | Description                                                                                                                                                                                                                                                                                                                                                       | 8:00 | 9:00 | 10:00 | 11:00 | 1:00 | 2:00 | 3:00 |
|--------|-------------------------------------------------------------------------------------------------------------------------------------------------------------------------------------------------------------------------------------------------------------------------------------------------------------------------------------------------------------------|------|------|-------|-------|------|------|------|
| BS-068 | <b>National Jamboree 2021</b><br>High adventure like you've never seen. Whitewater, climbing, zip lines, mountain biking, and much more. Come and learn about the National Jamboree and how Scouts register to attend with Samoset Council.                                                                                                                       |      |      |       |       |      |      |      |
| BS-061 | <b>Hiking Trails in Wisconsin</b><br>Ever wonder where some of the best hikes for Scouts are in the Samoset Council area? Learn about trails all over the state to share with your Scouts.                                                                                                                                                                        |      |      |       |       |      |      |      |
| BS-063 | <b>Scouts BSA Events for our Centennial</b><br>After 100 years of Scouting in Samoset Council, it's time to throw some Scout parties. Come find out what we have in store, and how to earn all your centennial celebration patches.                                                                                                                               |      |      |       |       |      |      |      |
| BS-067 | <b>Outdoor Gear for the New Scout</b><br>As a new parent, you're probably asking yourself "what does my son need to live in the woods"? Whether your troop is an avid outdoor adventure troop or one that camps just a couple times a year, come to find out what the minimum essentials are for different types of outings and where you can get the gear cheap! |      |      |       |       |      |      |      |
| BS-044 | <b>Service Projects – Helping other people at all times</b><br>Ever notice how proud the Scouts and their families get when they complete a service project? Why not coordinate more opportunities for this pride Come figure out what opportunities await your Troop to help other people in your community.                                                     |      |      |       |       |      |      |      |
| BS-066 | <b>Paddling the Boundary Waters</b><br>Want to paddle the Boundary Waters, but don't know where to start the planning, or what to expect. Dave has visited the boundary waters many times over the past 30 years. He's willing to share his experience and provide answers to your questions.                                                                     |      |      |       |       |      |      |      |

# SCOUTS BSA STUDIES

| Course | Description                                                                                                                                                                                                                                                                                                                                                                             | 8:00 | 9:00 | 10:00 | 11:00 | 1:00 | 2:00 | 3:00 |
|--------|-----------------------------------------------------------------------------------------------------------------------------------------------------------------------------------------------------------------------------------------------------------------------------------------------------------------------------------------------------------------------------------------|------|------|-------|-------|------|------|------|
| BS-022 | <b>Scouts BSA for New Parents</b><br>My kid just crossed over and it seems really busy and confusing. Chris has not only been in your shoes, but he's now a Scoutmaster reliving that experience every year with new parents. Come get some advice on what to expect now that your child is a Scout BSA member.                                                                         |      |      |       |       |      |      |      |
| BS-062 | <b>Fundraising for Adventure</b><br>Curious how to pay for all that Scout stuff or activities? Come find out how to help your Scouts pay their way.                                                                                                                                                                                                                                     |      |      |       |       |      |      |      |
| BS-057 | <b>Review of Samoset Council Life to Eagle Policies and Procedures</b><br>With the implementation of the new Samoset Council Operations Model in 2018, there have been some changes to the process of becoming an Eagle Scout. Learn what has changed, and what has stayed the same in this one-hour course designed to help you guide your Eagle Scout candidates through the process. |      |      |       |       |      |      |      |
| BS-063 | <b>Can You Camporee?</b><br>Ever attend a Camporee and think..."I wish they would have done...."? This is your chance to learn about what goes into planning a camporee and provide your input to some of the volunteers who plan these events.                                                                                                                                         |      |      |       |       |      |      |      |
| BS-018 | <b>High Adventure Opportunities</b><br>Learn where you can zip line in the mountains, live on a sailboat, kayak through a swamp or survive the arctic weather with your Troop.                                                                                                                                                                                                          |      |      |       |       |      |      |      |
| BS-101 | <b>Discover Scuba</b><br>Have you always wondered what it's like to breathe underwater? If you want to try scuba diving, but aren't quite ready to take the plunge into a certification course, Discover Scuba is for you. <b>You must be a swimmer. Takes place in the pool so bring your swimsuit and towel.</b>                                                                      |      |      |       |       |      |      |      |
| BS-102 | <b>Discover Scuba</b><br>See previous description.                                                                                                                                                                                                                                                                                                                                      |      |      |       |       |      |      |      |
| BS-103 | <b>Discover Scuba</b><br>See previous description.                                                                                                                                                                                                                                                                                                                                      |      |      |       |       |      |      |      |

# VENTURING STUDIES

| Course | Description                                                                                                                                                                                    | 8:00 | 9:00 | 10:00 | 11:00 | 1:00 | 2:00 | 3:00 |
|--------|------------------------------------------------------------------------------------------------------------------------------------------------------------------------------------------------|------|------|-------|-------|------|------|------|
| VN-024 | <b>Recruiting and Retention Tips for Venturing</b><br>Find out ways to recruit and retain youth from other crew leaders. Share your ideas and learn from each other. For youth and adults.     |      |      |       |       |      |      |      |
| VN-028 | <b>Can Scouts also be in Venturing</b><br>Learn the advantages of being dual registered in Scouts BSA and Venturing. For youth and adults.                                                     |      |      |       |       |      |      |      |
| VN-027 | <b>Fun Team Building Games (2 hrs)</b><br>Learn how to get everyone involved with fun team building games. For your and adults.                                                                |      |      |       |       |      |      |      |
| VN-021 | <b>Planning Events</b><br>Need resources to plan events? Learn how to mentor youth as they plan fun and safe events.                                                                           |      |      |       |       |      |      |      |
| VN-022 | <b>What are the Tier I, II &amp; III's in Venturing</b><br>What is this Tier thing and what does each level mean. Where to go on these adventures and how long are they. For youth and adults. |      |      |       |       |      |      |      |
| VN-014 | <b>How to run a crew Board of Review</b><br>Learn how a crew board of review is different from Scouts BSA reviews.                                                                             |      |      |       |       |      |      |      |

# GENERAL STUDIES

| Course | Description                                                                                                                                                                                                                                                                                                                                                                                                | 8:00 | 9:00 | 10:00 | 11:00 | 1:00 | 2:00 | 3:00 |
|--------|------------------------------------------------------------------------------------------------------------------------------------------------------------------------------------------------------------------------------------------------------------------------------------------------------------------------------------------------------------------------------------------------------------|------|------|-------|-------|------|------|------|
| GS-049 | <b>Leave No Trace Awareness</b><br>We should all practice Leave No Trace in our thinking and actions—wherever we go. Although Leave No Trace has its roots in backcountry and wilderness, the practices have been adapted so that they can be applied anywhere - from the backcountry, to local parks, to your backyard..                                                                                  |      |      |       |       |      |      |      |
| GS-065 | <b>Using Improv to Improve Your Leadership Skills</b><br>How to use improv techniques to improve as a leader by being present and open to possibilities with your pack, troop, or in your life by utilizing ideas from improv actors.                                                                                                                                                                      |      |      |       |       |      |      |      |
| GS-064 | <b>Combating Scouter Stress and Burnout</b><br>We've all had our moments when we ask ourselves, "Why are we involved in Scouting?" This session is designed to examine indicators of stress, how stress affects those around us, and how we might overcome these negative manifestations.                                                                                                                  |      |      |       |       |      |      |      |
| GS-057 | <b>Ladies in the Outdoors</b><br>How do we manage it when we are outside? Come gain some background knowledge, learn about products on the market, along with tricks and skills needed to make your outdoor life easier!                                                                                                                                                                                   |      |      |       |       |      |      |      |
| GS-047 | <b>Scoutbook Basics: The 101 of Scoutbook</b><br>Learn how to set up Scoutbook for your Unit, how to track Scout's progress, setup the calendar and communicate with Scouts and their parents. If you have never heard of Scoutbook or are just getting started, then this course is for you. Bring your laptop computer.                                                                                  |      |      |       |       |      |      |      |
| GS-066 | <b>Mining Internet Resources</b><br>Today's leaders are often expected to have answers for a large variety of questions, and are assumed to be experts on Scouting. Knowing where to find information can be the next best thing to having all the answers all the time. This course will concentrate not on the local "who do you call" but on effectively using the internet to locate needed resources. |      |      |       |       |      |      |      |

# GENERAL STUDIES

| Course | Description                                                                                                                                                                                                                                                                                                                                                                                                                                                                                              | 8:00 | 9:00 | 10:00 | 11:00 | 1:00 | 2:00 | 3:00 |
|--------|----------------------------------------------------------------------------------------------------------------------------------------------------------------------------------------------------------------------------------------------------------------------------------------------------------------------------------------------------------------------------------------------------------------------------------------------------------------------------------------------------------|------|------|-------|-------|------|------|------|
| GS-060 | <b>Chess I</b><br>Did your scout earn the Chess merit badge and now wants to play against you? Come to this session to learn the basics of chess from the local chess club.                                                                                                                                                                                                                                                                                                                              |      |      |       |       |      |      |      |
| GS-059 | <b>Succession Planning</b><br>Does your unit have an annual leadership plan? Learn methods to help you fill critical leadership roles for your unit before there is an opening.                                                                                                                                                                                                                                                                                                                          |      |      |       |       |      |      |      |
| GS-054 | <b>Awards and Knots: Recognizing and Thanking Scouts and Scouters</b><br>They might not admit it, but most volunteers are grateful for simple recognition. This session will cover training awards, recognition knots, special awards and certificates. Also, find out what awards are available to youth besides belt loops and merit badges.                                                                                                                                                           |      |      |       |       |      |      |      |
| GS-061 | <b>Chess II</b><br>This session is for adults who already know how to play and would like to enhance their skills. Come play a game and pick up some tips from the local chess club.                                                                                                                                                                                                                                                                                                                     |      |      |       |       |      |      |      |
| GS-033 | <b>Budgeting for a Pack, Troop or Unit: Making your Unit Financial Healthy</b><br>A great scouting program needs a solid financial base. Learn how to take your unit down the path of stable finances toward great programming and better retention. Put together the essential pieces of fundraising, budgeting, accounts, and evaluation.                                                                                                                                                              |      |      |       |       |      |      |      |
| GS-058 | <b>Scouter Training: Who, What, Why, and How</b><br>Learn how to begin online training plus what trainings are needed or available for your position. Every Scout deserves qualified, trained leaders who will provide the best program possible, the way it is intended. Trained leaders ensure that the goals of Scouts BSA are met. The leadership training program of the Boy Scouts of America provides this information and helps leaders become confident in carrying out their responsibilities. |      |      |       |       |      |      |      |

# GENERAL STUDIES

| Course | Description                                                                                                                                                                                                                                                                                                                                | 8:00 | 9:00 | 10:00 | 11:00 | 1:00 | 2:00 | 3:00 |
|--------|--------------------------------------------------------------------------------------------------------------------------------------------------------------------------------------------------------------------------------------------------------------------------------------------------------------------------------------------|------|------|-------|-------|------|------|------|
| GS-037 | <b>Tell me more about Woodbadge</b><br>Wood Badge is a leadership and team-building course designed for all adult Scouter's involved in Cub Scouting, Scouts BSA, Venturing, as well as district and council leaders. Find out how this training will enhance your Scouting, personal, and professional leadership and team skills.        |      |      |       |       |      |      |      |
| GS-027 | <b>Earning an Advanced Degree</b><br>A pre-requisite for those interested in earning a Master or Doctoral Degree next year. This session will discuss reasons why, and process for, completing the UOS graduate program.                                                                                                                   |      |      |       |       |      |      |      |
| GS-048 | <b>Scoutbook Advanced</b><br>Learn tricks to make using Scoutbook easier. Topics include the volunteer written and supported Feature Assistant Extension for Scoutbook, managing connections and moving Scouts to new units. This course will have plenty of time for Q&A so the course will go where attendees want. Bring your computer. |      |      |       |       |      |      |      |
| GS-062 | <b>Communication Using the True Colors Model</b><br>True Colors is a model for understanding yourself and others based on your personality temperament. By identifying your personality (and the personalities of others), True Colors provides insights into different motivations, actions, and communication approaches.                |      |      |       |       |      |      |      |
| GS-052 | <b>STEM Scouts – What is it About</b><br>STEM Scouts re-imagines creative ways to learn about science, technology, engineering and mathematics (STEM).                                                                                                                                                                                     |      |      |       |       |      |      |      |
| GS-051 | <b>Classroom Facilitated Youth Protection Training (YPT)</b><br>This training is required for all registered members of the BSA and must be completed before submitting an adult application or attending resident camp.                                                                                                                   |      |      |       |       |      |      |      |
| GS-063 | <b>Paracord Survival Bracelets</b><br>Learn how to make a survival bracelet and how to use one. Get tips on other cool paracord projects to try if time allows.                                                                                                                                                                            |      |      |       |       |      |      |      |

# SCOUTS BSA ACTIVITIES

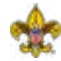

| Course | Description                                                                                                                                                                                                                                                                                                                                                                                                                                                                                                                                                       | 8:00 | 9:00 | 10:00 | 11:00 | 1:00 | 2:00 | 3:00 |
|--------|-------------------------------------------------------------------------------------------------------------------------------------------------------------------------------------------------------------------------------------------------------------------------------------------------------------------------------------------------------------------------------------------------------------------------------------------------------------------------------------------------------------------------------------------------------------------|------|------|-------|-------|------|------|------|
| YU-085 | <b>Citizenship in the Nation Merit Badge (7 hrs)</b><br>This merit badge helps a scout learn about his duties as a citizen in this country. NOTE: Requirements 3, 6 and 8 (bring a copy of the envelope used to send the letter) are pre-requisites to this course. This merit badge requires substantial preparation to be able to successfully complete the requirements during this session. Please review all requirements and be prepared to discuss as required. <b>Dress for the weather as the class will walk to Marathon Park as part of the class.</b> |      |      |       |       |      |      |      |
| YU-094 | <b>First Aid Merit Badge (7 hrs)</b><br>This eagle required merit badge is one of the original 57 merit badges. NOTE: Requirements 1 and 5 are pre-requisites to this course and will need to be done ahead of time. Please bring your home kit or pictures with a list of the contents and proof of your inspection of the troop kit.                                                                                                                                                                                                                            |      |      |       |       |      |      |      |
| YU-093 | <b>Communications Merit Badge (7 hrs)</b><br>Enhance your skills in expression as well as listening. Requirements 5, 8 and 9 will not be able to be completed during this session. Please bring proof or documentation for these pre-reqs. Be ready to discuss and present the remaining requirements. All notes or supplies needed should be brought along to the session.                                                                                                                                                                                       |      |      |       |       |      |      |      |
| YU-025 | <b>Personal Management Merit Badge (7 hrs)</b><br>Strengthens your personal financial and time management skills. Requirements 1,2 and 8 will not be able to be completed during this session. They should be done ahead of time if possible. It is also highly suggested that requirement 9 is completed or at least started prior to this session. Be prepared to discuss all remaining requirements.                                                                                                                                                           |      |      |       |       |      |      |      |
| YU-092 | <b>Art Merit Badge (7 hrs)</b><br>In this elective merit badge, you will have a chance to unleash your creative side. Most participants discover they are much more artistic than they ever thought. Requirements 5, 6, & 7 are pre-requisites.                                                                                                                                                                                                                                                                                                                   |      |      |       |       |      |      |      |

Merit Badge requirements can be found at [Scouting.org](https://www.scouting.org).

# SCOUTS BSA ACTIVITIES

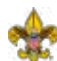

| Course | Description                                                                                                                                                                                                                                                                                                                                                                             | 8:00 | 9:00 | 10:00 | 11:00 | 1:00 | 2:00 | 3:00 |
|--------|-----------------------------------------------------------------------------------------------------------------------------------------------------------------------------------------------------------------------------------------------------------------------------------------------------------------------------------------------------------------------------------------|------|------|-------|-------|------|------|------|
| YU-088 | <b>Public Speaking Merit Badge (4 hrs)</b><br>Even if you haven't stood at a podium on the stage and find the whole idea scary, sooner or later, someone is going to ask you to get up and say a few words. If you are prepared, it won't be scary. It can even be fun." Please have your speeches prepared ahead of time.                                                              |      |      |       |       |      |      |      |
| YU-100 | <b>Animal Science Merit Badge (3 hrs)</b><br>Cattle, horses, sheep, goats, hogs, poultry and other domesticated animals are important to people for many reasons. This elective merit badge will increase your understanding of livestock. Requirement 6 (any of the options) will need to be completed ahead of time. Please bring your notes, sketches, etc for classroom discussion. |      |      |       |       |      |      |      |
| YU-055 | <b>Traditional Games</b><br>Take some time to play a board game or other traditional games.                                                                                                                                                                                                                                                                                             |      |      |       |       |      |      |      |
| YU-066 | <b>The ABC's of BSA</b><br>Join us for an overview of the Scouts BSA structure, blue cards and terminology. By the end of the class you will know what PLC, SPL, COH, BOR and MB mean.                                                                                                                                                                                                  |      |      |       |       |      |      |      |
| YU-082 | <b>Chess Basics</b><br>For all ages, but suggested for age 10 and up. Join us to learn how to play this fun, ancient game of planning and strategy.                                                                                                                                                                                                                                     |      |      |       |       |      |      |      |
| YU-074 | <b>Traditional Games 2</b><br>Take some time to play a board game or other traditional games.                                                                                                                                                                                                                                                                                           |      |      |       |       |      |      |      |
| YU-090 | <b>Chess</b><br>This session is for youth who already know how to play and would like to enhance their skillset. Come play a game and pick up some tips from the local chess club.                                                                                                                                                                                                      |      |      |       |       |      |      |      |
| YU-101 | <b>Discover Scuba</b><br>Have you always wondered what it's like to breathe underwater? If you want to try scuba diving, but aren't quite ready to take the plunge into a certification course, Discover Scuba is for you. <b>You must be a swimmer and at least age 10. Takes place in the pool so bring your swimsuit and towel.</b>                                                  |      |      |       |       |      |      |      |

# SCOUTS BSA ACTIVITIES



| Course | Description                                                                                                                                                                                                                                                                                                                                                                                                                                                                                           | 8:00 | 9:00 | 10:00 | 11:00 | 1:00 | 2:00 | 3:00 |
|--------|-------------------------------------------------------------------------------------------------------------------------------------------------------------------------------------------------------------------------------------------------------------------------------------------------------------------------------------------------------------------------------------------------------------------------------------------------------------------------------------------------------|------|------|-------|-------|------|------|------|
| YU-102 | <b>Discover Scuba</b><br>See previous description.                                                                                                                                                                                                                                                                                                                                                                                                                                                    |      |      |       |       |      |      |      |
| YU-103 | <b>Discover Scuba</b><br>See previous description.                                                                                                                                                                                                                                                                                                                                                                                                                                                    |      |      |       |       |      |      |      |
| YU-023 | <b>Youth Opportunities in the Order of the Arrow</b><br>Whether you are a new member or a long time member, there is always something new and exciting to do with the Order of the the Arrow.                                                                                                                                                                                                                                                                                                         |      |      |       |       |      |      |      |
| YU-067 | <b>Scout Rank &amp; Fingerprinting Merit Badge (3 hrs)</b><br>This session will help prepare you to pass the Scous BSA Rank requirements as well as completing a fun merit badge.                                                                                                                                                                                                                                                                                                                     |      |      |       |       |      |      |      |
| YU-068 | <b>Rope Skills (3 hrs)</b><br>During this session we will work on the Tenderfoot, 2nd Class and 1st Class rope and knot requirements. Complete one requirement or more. The goal is to improve your rope and knot skills.                                                                                                                                                                                                                                                                             |      |      |       |       |      |      |      |
| YU-019 | <b>Introduction to Leadership Skills for Troops (5 hrs)</b><br>Recommended for youth prior to attending NYLT. The course introduces the role of a leader and how to interact with others. Interactions and reactions are all dealt with along with ethical decisions regarding what a leader must Be, Know, and Do. Formerly known as JLT (Junior Leader Training) and the TLT (Troop Leader Training), the course evolved so that the youth are prepared to be the leaders in the "youth led" troop. |      |      |       |       |      |      |      |
| YU-086 | <b>Coin Collecting Merit Badge (3 hrs)</b><br>Coin collecting is one of the oldest of all hobbies. This elective merit badge will help to sharpen your coin collecting skills and numismatic knowledge. NOTE: Requirements 6, 7 and 9 are pre-requisites to this course. You will need to bring the coins you collected for those requirements to this session.                                                                                                                                       |      |      |       |       |      |      |      |
| YU-058 | <b>Snorkeling, BSA (3 hrs)</b><br>Provides an introduction to snorkeling, encourages the development of aquatic skills and provides a foundation for more advanced underwater activity. This is not a merit badge.<br><b>You must be a swimmer. Takes place in the pool so bring your swimsuit and towel.</b>                                                                                                                                                                                         |      |      |       |       |      |      |      |

# CS YOUTH ACTIVITIES

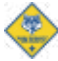

| Course | Description                                                                                                                                                                                                                                                                                                                                                                                         | 8:00 | 9:00 | 10:00 | 11:00 | 1:00 | 2:00 | 3:00 |
|--------|-----------------------------------------------------------------------------------------------------------------------------------------------------------------------------------------------------------------------------------------------------------------------------------------------------------------------------------------------------------------------------------------------------|------|------|-------|-------|------|------|------|
| YU-055 | <b>Traditional Games</b><br>Take some time to play a board game or other traditional games. This session will cover requirement #2 of the Tiger Elective Adventure: Tiger-iffic and #1 of the Lion: Rumble in the Jungle. This class is for all ages.                                                                                                                                               |      |      |       |       |      |      |      |
| YU-082 | <b>Chess Basics</b><br>For all ages, but suggested for age 10 and up. Join us to learn how to play this fun, ancient game of planning and strategy.                                                                                                                                                                                                                                                 |      |      |       |       |      |      |      |
| YU-090 | <b>Chess Basics</b><br>For all ages, but suggested for age 10 and up. Join us to learn how to play this fun, ancient game of planning and strategy.                                                                                                                                                                                                                                                 |      |      |       |       |      |      |      |
| YU-074 | <b>Traditional Games 2</b><br>Take some time to play a board game or other traditional games. This session will cover requirement #2 of the Tiger Elective Adventure: Tiger-iffic! and #1 of Lion: Rumble in the Jungle. This class is for all ages.                                                                                                                                                |      |      |       |       |      |      |      |
| YU-105 | <b>Collecting Cubs</b><br>We will complete the Wolf elective adventure “Collections and Hobbies” focusing on collections. Please bring a collection of at least 10 items or pictures of your displayed collection.                                                                                                                                                                                  |      |      |       |       |      |      |      |
| YU-097 | <b>Marble Madness (2 hrs)</b><br>Come to this session to learn about a game that has been played for thousands of years. We will cover all of the requirements for the Bear elective adventure “Marble Madness”, but will be fun for all ages. Bring your own marbles or use some of ours.                                                                                                          |      |      |       |       |      |      |      |
| YU-095 | <b>CS NOVA Award Can Code (3 hrs)</b><br>The NOVA Awards program incorporates learning with cool activities and exposure to science, technology, engineering, and mathematics. This module is designed to help Cub Scouts explore how people instruct computers and how they affect their lives. This course is not suitable for Tigers or Lion Scouts. Scouts must bring their current Cyber Chip. |      |      |       |       |      |      |      |

# CS YOUTH ACTIVITIES

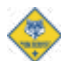

| Course | Description                                                                                                                                                                                                                                                                          | 8:00 | 9:00 | 10:00 | 11:00 | 1:00 | 2:00 | 3:00 |
|--------|--------------------------------------------------------------------------------------------------------------------------------------------------------------------------------------------------------------------------------------------------------------------------------------|------|------|-------|-------|------|------|------|
| YU-091 | <b>Movie Time</b><br>Take a break and watch a family friendly G rated movie.                                                                                                                                                                                                         |      |      |       |       |      |      |      |
| YU-107 | <b>Tiger-iffic!</b><br>Who doesn't like games? We will explore a variety of games as we complete most of the requirements for the Tiger elective adventure: Tiger-iffic! Enroll in Relay Games to complete the remaining requirement(s).                                             |      |      |       |       |      |      |      |
| YU-106 | <b>Marble Racers</b><br>Ready, set, go! Join the bears as they make marble racers.                                                                                                                                                                                                   |      |      |       |       |      |      |      |
| YU-041 | <b>Art and Tangrams</b><br>Covers all of the requirements for the Tiger elective adventure "Stories in Shapes," but anyone who would like to learn a little about art and work with tangrams is welcome to join us. This will also cover Webelos/AoL "Art Explosion" requirement #1. |      |      |       |       |      |      |      |
| YU-104 | <b>Tiger Theater</b><br>Puppets, charades and masks! Have some fun learning about theater. This will cover the Tiger elective adventure: Tiger Theater.                                                                                                                              |      |      |       |       |      |      |      |
| YU-038 | <b>Caring Cubs (2 Hrs)</b><br>This course will cover all of the requirements for the Wolf elective adventure "Cubs Who Care" and all of the requirements for the Webelos/AoL elective adventure "Aware and Care."                                                                    |      |      |       |       |      |      |      |
| YU-081 | <b>Rumble in the Jungle</b><br>Let's have some jungle fun. We will play a game and make a jungle animal mask. This will cover the Lion adventure: Rumble in the Jungle.                                                                                                              |      |      |       |       |      |      |      |

# CS YOUTH ACTIVITIES

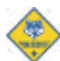

| Course | Description                                                                                                                                                                                                                                                                   | 8:00 | 9:00 | 10:00 | 11:00 | 1:00 | 2:00 | 3:00 |
|--------|-------------------------------------------------------------------------------------------------------------------------------------------------------------------------------------------------------------------------------------------------------------------------------|------|------|-------|-------|------|------|------|
| YU-099 | <b>Forensics Bear Adventure (2 hrs)</b><br>Learn about science tests and techniques used in the detection of crime. This course will cover all of the requirements for the Bear elective adventure "Forensics."                                                               |      |      |       |       |      |      |      |
| YU-098 | <b>Yo-Yo Adventure (2 hrs)</b><br>This session will cover all of the requirements for this preview adventure. At this time, this adventure is not approved for Lions or Tigers). Bring your yo-yo if you have one. There will be a limited supply to use during this session. |      |      |       |       |      |      |      |
| YU-079 | <b>Green Thumb Fun</b><br>This introduction to gardening will help you learn where our food comes from. We will cover all of the requirements for the Lion elective adventure: Ready Set Grow as well as some of the Wolf elective adventure: Grow Something.                 |      |      |       |       |      |      |      |
| YU-075 | <b>Adventures in Coins</b><br>This elective Wolf adventure helps you learn a little about coins. It might even help you get started on a coin collection.                                                                                                                     |      |      |       |       |      |      |      |
| YU-040 | <b>Roaring Laughter for Bears</b><br>This course will cover all of the requirements for the Bear elective adventure "Roaring Laughter" but will be fun for all ages, including Tigers. Come and have a laugh.                                                                 |      |      |       |       |      |      |      |

## OPEN GYM/ORGANIZED GAMES

Have an open time slot? Come to the gym to play some games. Bring your gym shoes and get active. You may sign up for multiple sessions if you wish.

NOTE: The gym will be open all day with organized games to meet some of the Cub Scout requirements, but all ages are welcome. Pop in if you get out of a class early, or have a gap in your scheduling.

## GYM ACTIVITIES

| Course | Description                                                                                                                                                                                                   | 8:00 | 9:00 | 10:00 | 11:00 | 1:00 | 2:00 | 3:00 |
|--------|---------------------------------------------------------------------------------------------------------------------------------------------------------------------------------------------------------------|------|------|-------|-------|------|------|------|
| GYM-1  | <b>Active Games</b><br>Active games that will meet requirement #1 of "Tiger Tag," but is designed for all ages.                                                                                               |      |      |       |       |      |      |      |
| GYM-2  | <b>Relay Games (AM)</b><br>Relay games that will complete #2 and 3 of Tiger Elective Adventure: Tiger Tag and #1 of Lion: On Your Mark.                                                                       |      |      |       |       |      |      |      |
| GYM-3  | <b>Sports (2 hrs)</b><br>While having fun with sports in the gym, Scouts will complete all of the requirements for the Webelos/AOL elective adventure sports. Wear your gym shoes and be ready to get active. |      |      |       |       |      |      |      |
| GYM-5  | <b>Open Gym I</b><br>Come to the gym to hang out with your friends and our staff.                                                                                                                             |      |      |       |       |      |      |      |
| GYM-6  | <b>Open Gym II</b><br>Come to the gym to hang out with your friends and our staff.                                                                                                                            |      |      |       |       |      |      |      |
| GYM-7  | <b>Relay Games (PM)</b><br>Relay games that will complete the Tiger Elective Adventure: Tiger Tag and #1 of Lion: On Your Mark, but is designed for all ages.                                                 |      |      |       |       |      |      |      |
