# Supplementary material
Source: ML conference proceedings conference paper supplement (https://openreview.net/forum?id=iGDv1e4rFY)
Supplement: supplementary_material [file pages.pdf › submission/example-qa/example_4/chunk_0/pages.pdf]

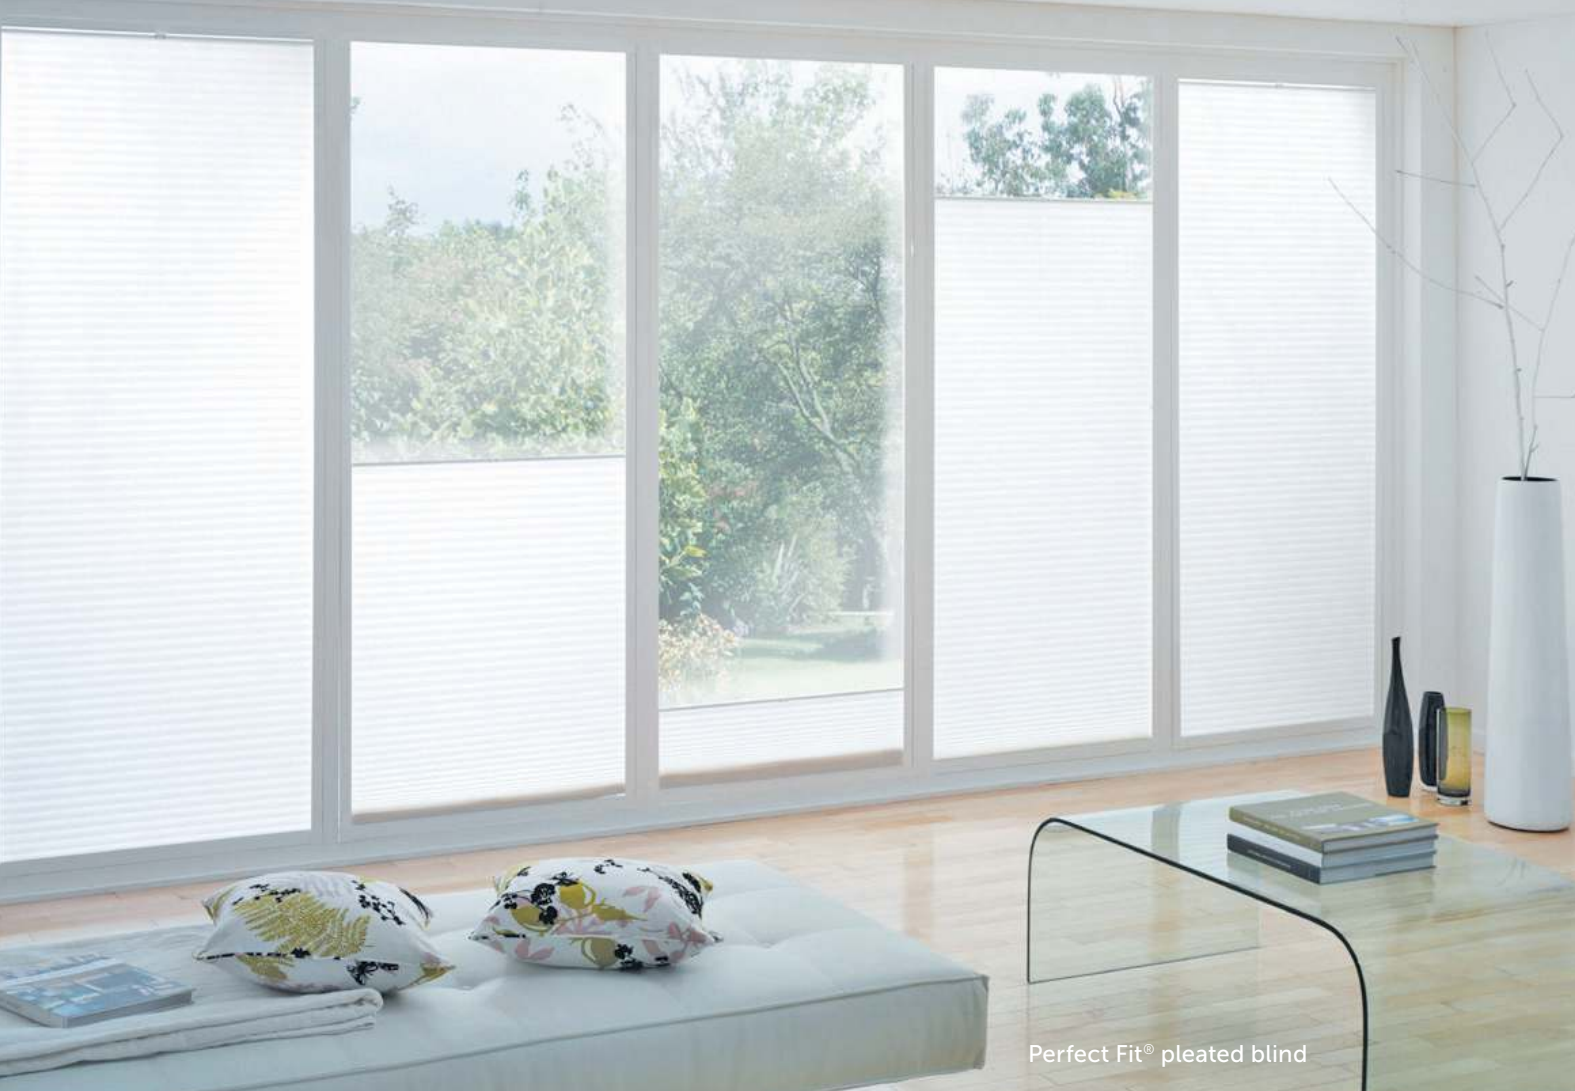

Perfect Fit® pleated blind

## Potential home energy savings using our fabrics

To further maximise the superb insulating qualities of the Perfect Fit® system, you can choose to have one of our energy efficient fabrics and save yourself up to 15% on your fuel bills by reducing the heat loss through winter.

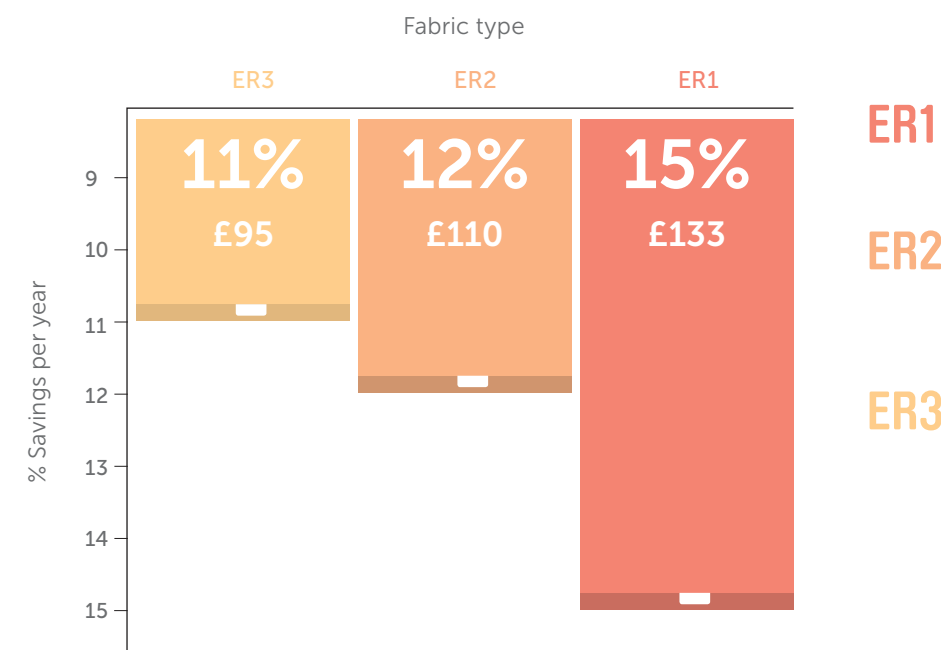

Excellent insulating properties

ER1

High level of insulation and energy savings of up to 15% per year\* can be achieved with these fabrics.

ER2

These fabrics provide a good level of insulation and energy savings of up to 12% per year\* can be achieved with these fabrics.

ER3

These are the essential fabrics for window furnishings and energy savings of up to 11% per year\* can be achieved with these fabrics.

AWARD  
WINNING

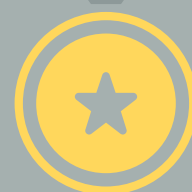

## REDUCE COSTS WITH OUR AWARD WINNING BLINDS

For the ultimate in style, the award winning Perfect Fit® blind is the only choice to make

One of the unique features of the Perfect Fit® frame is it's outstanding thermal efficiency. The frame fits flush against your window to help reduce heat build up in summer and retain heat in winter, in turn keeping your cooling and heating bills to a minimum!

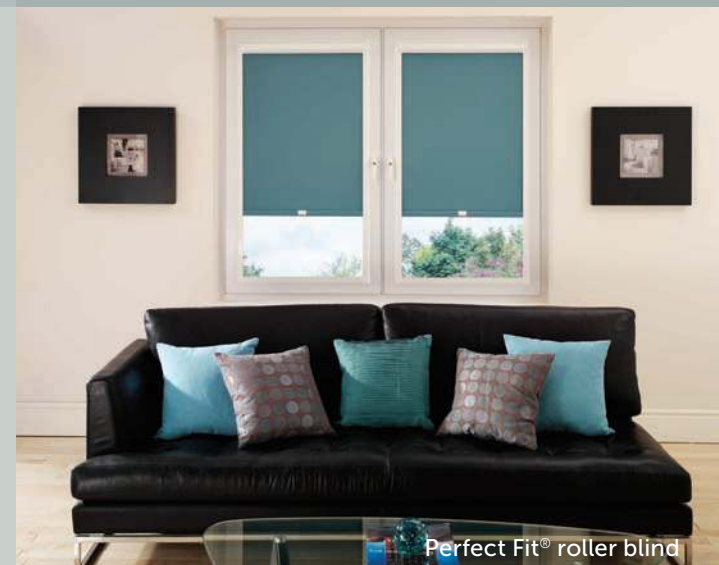

Perfect Fit® roller blind

Perfect Fit® roller blind

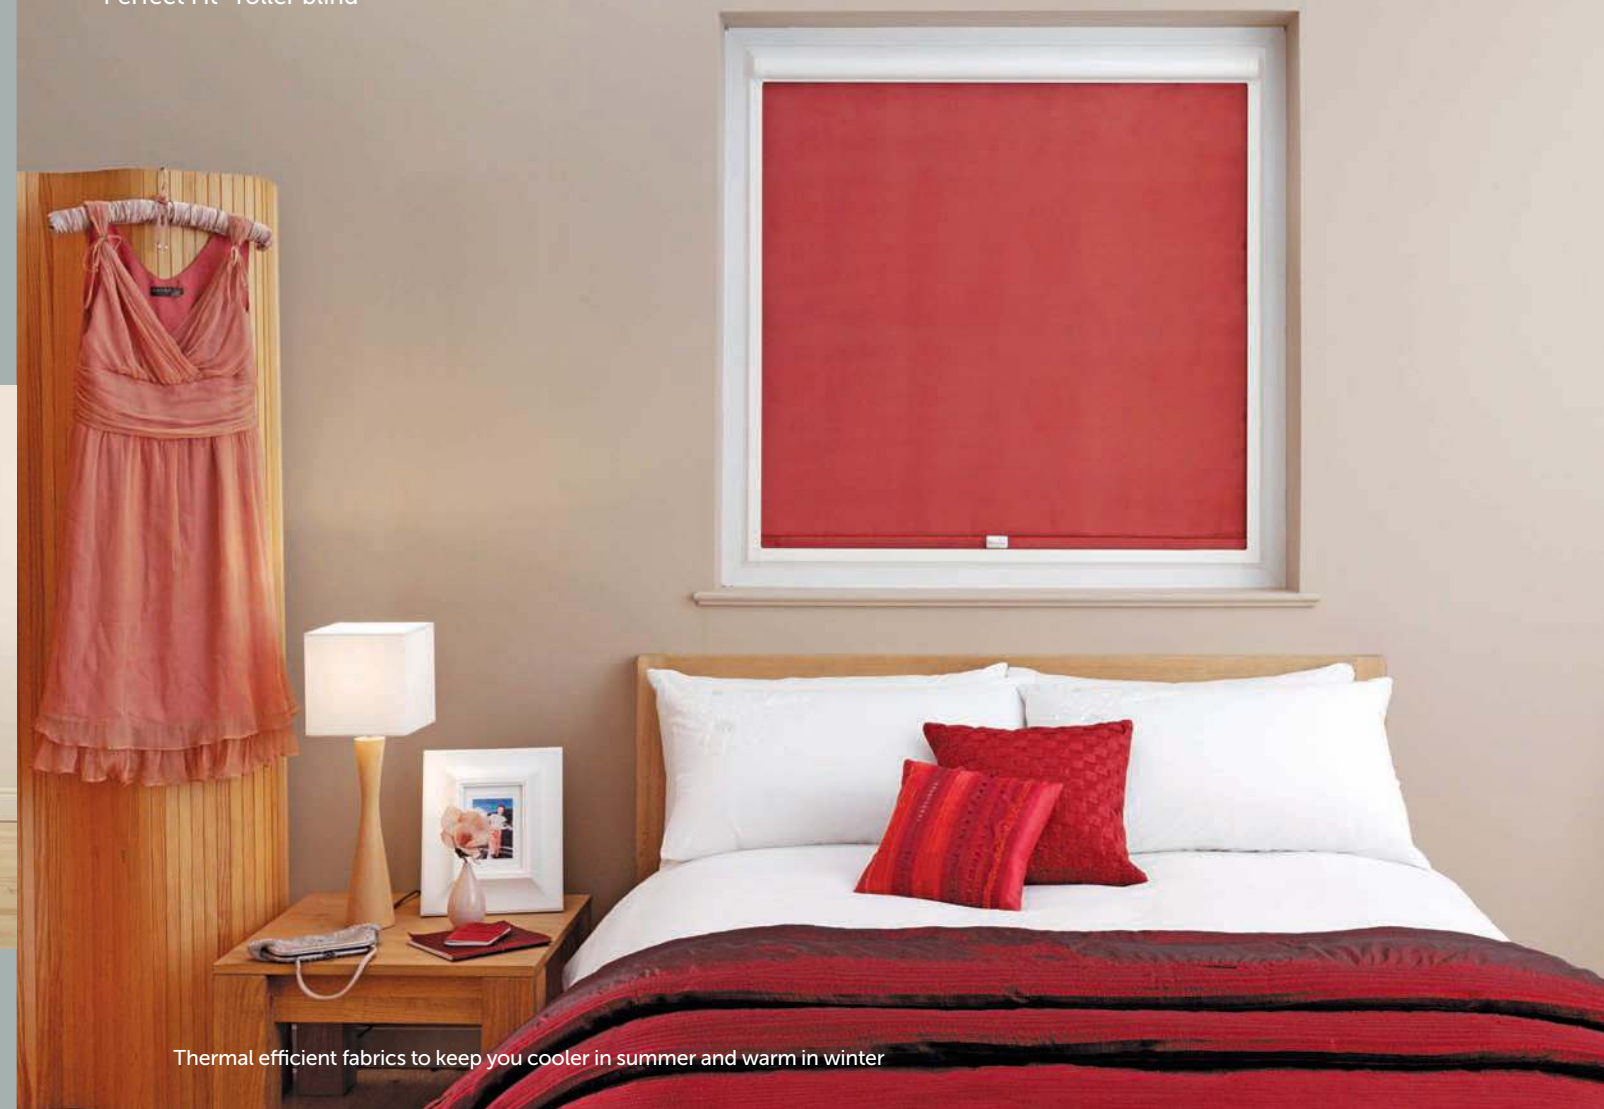

Thermal efficient fabrics to keep you cooler in summer and warm in winter

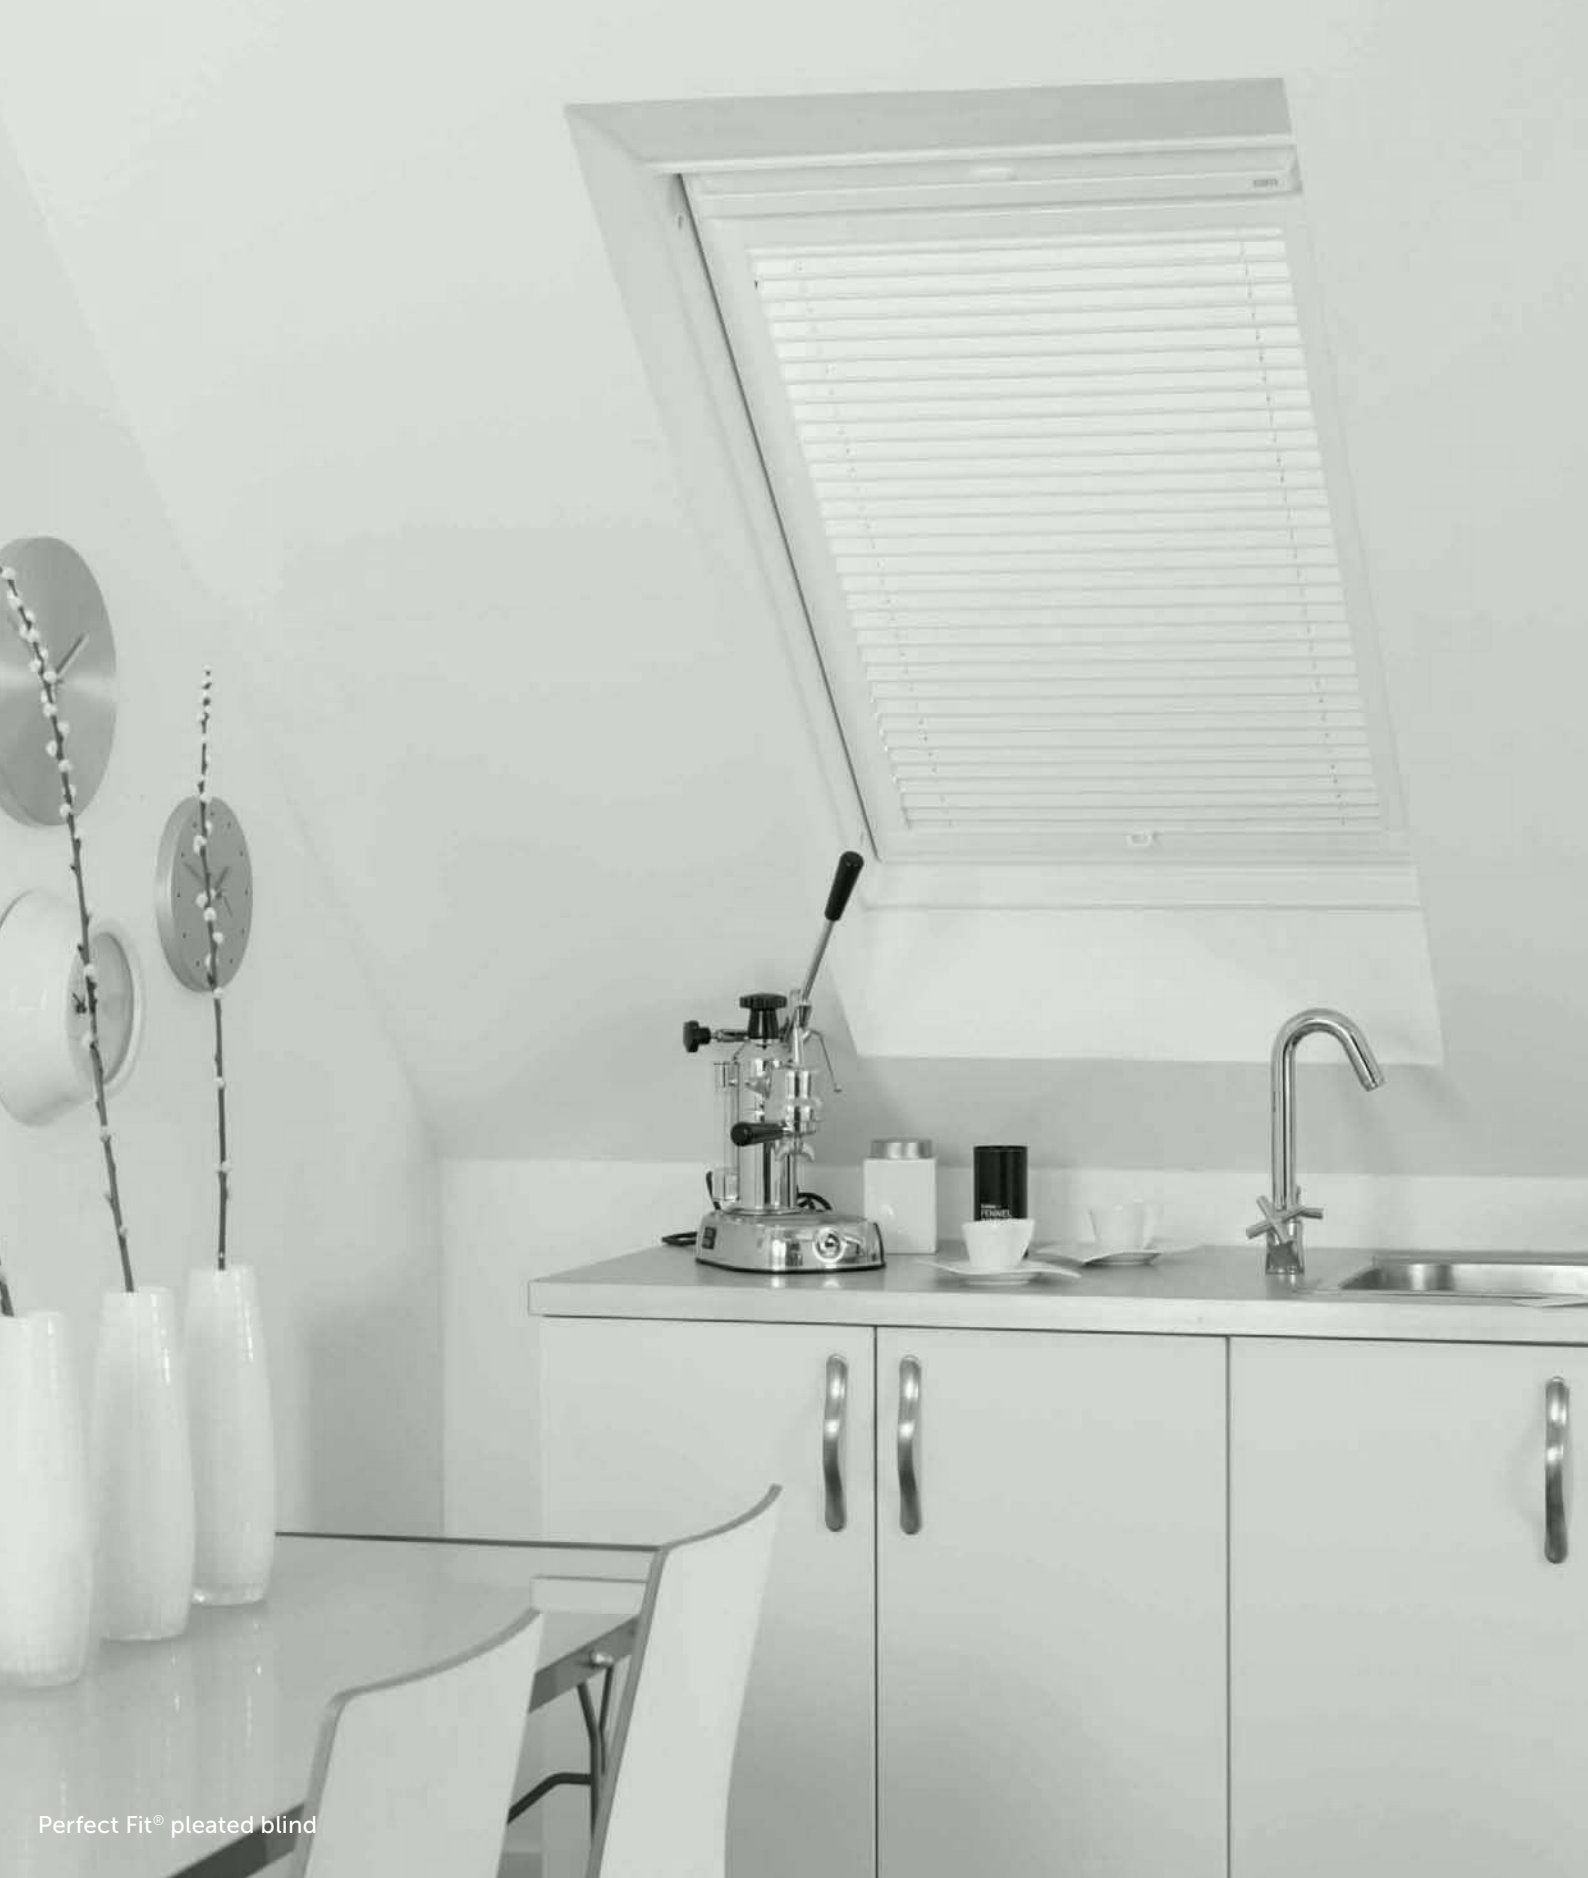

Perfect Fit® pleated blind

*Morley*

GLASS & GLAZING

T: 0113 277 8722 F: 0113 277 8723 [www.morleyglass.co.uk](http://www.morleyglass.co.uk) [info@morleyglass.co.uk](mailto:info@morleyglass.co.uk)

Morley Glass and Glazing Limited, Unit 27, Millshaw Park Industrial Estate,  
Millshaw Park Drive, Leeds LS11 0LU

All images and content © 2013 Morley Glass & Glazing and protected under UK and international law.  
All rights reserved. Reproduction by any means without prior permission is strictly forbidden.

  
LOUVOLITE

  
BRITISH BLIND & SHUTTER ASSOCIATION

  
make it  
safe
