# Supplementary material
Source: ML conference proceedings conference paper supplement (https://openreview.net/forum?id=iGDv1e4rFY)
Supplement: supplementary_material [file pages.pdf › submission/example-qa/example_6/chunk_0/pages.pdf]

# Aligned Leisure | COVID-19 Safe Plan

Last Updated 29 June 2021

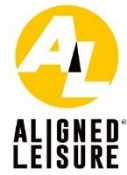

| Document Title                     | Prepared By                                                  | Original Date Prepared |
|------------------------------------|--------------------------------------------------------------|------------------------|
| Aligned Leisure COVID-19 Safe Plan | Simon Bryson,<br>Group Operations Manager                    | 04/08/2020             |
| Last Reviewed                      | Details of Changes                                           | Next Review Date       |
| 29/06/2021                         | Updated to align to new Government contact tracing protocols | 01/10/2021             |

## Background | Why have we created this plan?

The health and safety of our people, both staff and customers, has always been at the forefront of our operations. As we continue to navigate the challenges faced by the current COVID-19 health alert, our focus on safety has continued to remain at its highest. The Aligned Leisure COVID-19 Safe Plan has been developed to demonstrate the measures, controls and processes in place to support a safe environment for our customers, staff and visitors across our organisation, and is updated as advice changes.

The plan has been based on the six COVIDSafe principles of:

1. Ensure physical distancing
2. Wear a face covering
3. Practice good hygiene
4. Keep records and act quickly if workers become unwell
5. Avoid interactions in enclosed spaces
6. Create workforce bubbles

**Responsibilities** | All Aligned Leisure staff are responsible for supporting a safe environment for all and in line with this plan, and the Aligned Leisure COVID Safe Training or COVID-19 Return to Work Training Program.

All worksites must have at a minimum one (1) COVID-19 Safety Marshal on duty at all times, with the exception of locations with health clubs/gyms which will have two (2). The role of the COVID-19 Safety Marshal is to ensure that all aspects of this plan are appropriately implemented, monitored and followed during their shift time and in line with our COVID-19 Safety Marshal position description.

During all staffed hours, all worksites must also have a dedicated COVID-19 Check-In Marshal on duty at all times. This person must be based at the facility's entrance (or reception area) and is responsible for ensuring that every effort is made to have all visitors follow the correct check-in protocol.

**Applicable to** | All Aligned Leisure operated locations
