# Supplementary material
Source: ML conference proceedings conference paper supplement (https://openreview.net/forum?id=iGDv1e4rFY)
Supplement: supplementary_material [file pages.pdf › submission/example-qa/example_15/chunk_1/pages.pdf]

**NOW, THEREFORE, BE IT RESOLVED**, the Prosper Portland Board hereby authorizes the Executive Director to execute an amendment to the COEP IGA with OMF and OEHR (“Amendment”), substantially consistent with the draft attached hereto as Exhibit A, for the purpose of implementing Phase I of COEP;

**BE IT FURTHER RESOLVED**, the Executive Director may take any and all actions necessary or appropriate to fulfill the terms and conditions of the Amendment, including, without limitation, extending existing COEP sub-grant agreements for the extension period established in the Amendment and passing through added funding to sub-grantees;

**BE IT FURTHER RESOLVED**, the Executive Director is authorized to approve further changes, amendments, or other modifications to the COEP IGA or the Amendment prior to and subsequent to execution so long as such changes do not materially increase Prosper Portland’s risks or obligations, as determined by the Executive Director in consultation with the general counsel;

**BE IT FURTHER RESOLVED**, that the delegation of authority provided to the Executive Director pursuant to this Resolution is in addition to, and not in limitation of, the Executive Director’s delegated authority pursuant to the Existing COEP Resolutions; and

**BE IT FURTHER RESOLVED**, that this resolution shall become effective immediately upon its adoption.

Adopted by the Prosper Portland Commission on July 14, 2021



---

Pam Feigenbutz, Recording Secretary

**CITY OF PORTLAND  
CITY INTERGOVERNMENTAL AGREEMENT NO. 30007251  
PROSPER PORTLAND INTERGOVERNMENTAL AGREEMENT NO. 1  
AMENDMENT NO. ONE (1)**

**FOR ADMINISTRATION OF THE  
COMMUNITY OPPORTUNITIES & ENHANCEMENTS PROGRAM**

This Amendment No. 1 (the “Amendment”) to the Intergovernmental Agreement dated February 29, 2020, City of Portland Contract No. 30007251 (the “IGA”) is made and entered into effective as of July 1, 2021 (the “Effective Date”) by and among the City of Portland, through the Office of Management and Finance (“OMF”), Office of Equity and Human Rights (“OEHR”), and Prosper Portland (“Prosper”). The term “City,” as used in this Amendment, collectively refers to OMF, OEHR, and the City Attorney’s Office. Capitalized terms used in this Amendment have the same meanings ascribed to those terms in the IGA.

Whereas the City established the Community Opportunities and Enhancements Program (the “COEP”) to set aside one percent (1%) of certain costs from its public improvement contracts to support low-income, disadvantaged, minority and women workers in the construction trades and the development and growth of D/M/W/ESB/SDVBE firms; and

Whereas the City partnered with Prosper to administer and distribute the COEP funds per the terms of the IGA; and

Whereas after the initial term of the IGA, \$641,761 in non-Ratepayer sourced COEP Fee revenue funds are available to be distributed through June 30, 2022; and

Whereas the City and Prosper mutually desire to extend the term, change one of the main contacts, and make additional changes to the IGA;

Now therefore, the Parties agree to amend the IGA as follows:

- a. The Term and Termination section of the IGA is amended to extend the term for an additional twelve (12) months, from July 1, 2021 through June 30, 2022 (the “Extension Period”).
- b. The Parties section of the IGA is amended as follows:
  - Change the Main Contact for OMF from “Cathy Sherick” to “The Chief Procurement Officer.”
  - Change Prosper’s address to 220 NW 2<sup>nd</sup> Ave., Suite 200, Portland, OR 97209.
- c. The following additional changes to the IGA are hereby made. Additions are noted in *italic* and **bold**. Deletions are noted in ~~strikethrough~~.

ARTICLE 2 PROSPER RESPONSIBILITIES - Section II. Reporting on Grant Program Administration is amended and restated in its entirety to read:

***Prosper will provide a report, due February 1, 2022 which will include program***
