# Supplementary material
Source: ML conference proceedings conference paper supplement (https://openreview.net/forum?id=iGDv1e4rFY)
Supplement: supplementary_material [file pages.pdf › submission/example-qa/example_17/chunk_0/pages.pdf]

# SCOUTS BSA ACTIVITIES

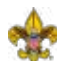

| Course | Description                                                                                                                                                                                                                                                                                                                                                                             | 8:00 | 9:00 | 10:00 | 11:00 | 1:00 | 2:00 | 3:00 |
|--------|-----------------------------------------------------------------------------------------------------------------------------------------------------------------------------------------------------------------------------------------------------------------------------------------------------------------------------------------------------------------------------------------|------|------|-------|-------|------|------|------|
| YU-088 | <b>Public Speaking Merit Badge (4 hrs)</b><br>Even if you haven't stood at a podium on the stage and find the whole idea scary, sooner or later, someone is going to ask you to get up and say a few words. If you are prepared, it won't be scary. It can even be fun." Please have your speeches prepared ahead of time.                                                              |      |      |       |       |      |      |      |
| YU-100 | <b>Animal Science Merit Badge (3 hrs)</b><br>Cattle, horses, sheep, goats, hogs, poultry and other domesticated animals are important to people for many reasons. This elective merit badge will increase your understanding of livestock. Requirement 6 (any of the options) will need to be completed ahead of time. Please bring your notes, sketches, etc for classroom discussion. |      |      |       |       |      |      |      |
| YU-055 | <b>Traditional Games</b><br>Take some time to play a board game or other traditional games.                                                                                                                                                                                                                                                                                             |      |      |       |       |      |      |      |
| YU-066 | <b>The ABC's of BSA</b><br>Join us for an overview of the Scouts BSA structure, blue cards and terminology. By the end of the class you will know what PLC, SPL, COH, BOR and MB mean.                                                                                                                                                                                                  |      |      |       |       |      |      |      |
| YU-082 | <b>Chess Basics</b><br>For all ages, but suggested for age 10 and up. Join us to learn how to play this fun, ancient game of planning and strategy.                                                                                                                                                                                                                                     |      |      |       |       |      |      |      |
| YU-074 | <b>Traditional Games 2</b><br>Take some time to play a board game or other traditional games.                                                                                                                                                                                                                                                                                           |      |      |       |       |      |      |      |
| YU-090 | <b>Chess</b><br>This session is for youth who already know how to play and would like to enhance their skillset. Come play a game and pick up some tips from the local chess club.                                                                                                                                                                                                      |      |      |       |       |      |      |      |
| YU-101 | <b>Discover Scuba</b><br>Have you always wondered what it's like to breathe underwater? If you want to try scuba diving, but aren't quite ready to take the plunge into a certification course, Discover Scuba is for you. <b>You must be a swimmer and at least age 10. Takes place in the pool so bring your swimsuit and towel.</b>                                                  |      |      |       |       |      |      |      |

# SCOUTS BSA ACTIVITIES



| Course | Description                                                                                                                                                                                                                                                                                                                                                                                                                                                                                           | 8:00 | 9:00 | 10:00 | 11:00 | 1:00 | 2:00 | 3:00 |
|--------|-------------------------------------------------------------------------------------------------------------------------------------------------------------------------------------------------------------------------------------------------------------------------------------------------------------------------------------------------------------------------------------------------------------------------------------------------------------------------------------------------------|------|------|-------|-------|------|------|------|
| YU-102 | <b>Discover Scuba</b><br>See previous description.                                                                                                                                                                                                                                                                                                                                                                                                                                                    |      |      |       |       |      |      |      |
| YU-103 | <b>Discover Scuba</b><br>See previous description.                                                                                                                                                                                                                                                                                                                                                                                                                                                    |      |      |       |       |      |      |      |
| YU-023 | <b>Youth Opportunities in the Order of the Arrow</b><br>Whether you are a new member or a long time member, there is always something new and exciting to do with the Order of the the Arrow.                                                                                                                                                                                                                                                                                                         |      |      |       |       |      |      |      |
| YU-067 | <b>Scout Rank &amp; Fingerprinting Merit Badge (3 hrs)</b><br>This session will help prepare you to pass the Scous BSA Rank requirements as well as completing a fun merit badge.                                                                                                                                                                                                                                                                                                                     |      |      |       |       |      |      |      |
| YU-068 | <b>Rope Skills (3 hrs)</b><br>During this session we will work on the Tenderfoot, 2nd Class and 1st Class rope and knot requirements. Complete one requirement or more. The goal is to improve your rope and knot skills.                                                                                                                                                                                                                                                                             |      |      |       |       |      |      |      |
| YU-019 | <b>Introduction to Leadership Skills for Troops (5 hrs)</b><br>Recommended for youth prior to attending NYLT. The course introduces the role of a leader and how to interact with others. Interactions and reactions are all dealt with along with ethical decisions regarding what a leader must Be, Know, and Do. Formerly known as JLT (Junior Leader Training) and the TLT (Troop Leader Training), the course evolved so that the youth are prepared to be the leaders in the "youth led" troop. |      |      |       |       |      |      |      |
| YU-086 | <b>Coin Collecting Merit Badge (3 hrs)</b><br>Coin collecting is one of the oldest of all hobbies. This elective merit badge will help to sharpen your coin collecting skills and numismatic knowledge. NOTE: Requirements 6, 7 and 9 are pre-requisites to this course. You will need to bring the coins you collected for those requirements to this session.                                                                                                                                       |      |      |       |       |      |      |      |
| YU-058 | <b>Snorkeling, BSA (3 hrs)</b><br>Provides an introduction to snorkeling, encourages the development of aquatic skills and provides a foundation for more advanced underwater activity. This is not a merit badge.<br><b>You must be a swimmer. Takes place in the pool so bring your swimsuit and towel.</b>                                                                                                                                                                                         |      |      |       |       |      |      |      |
