# Supplementary material
Source: ML conference proceedings conference paper supplement (https://openreview.net/forum?id=iGDv1e4rFY)
Supplement: supplementary_material [file pages.pdf › submission/example-qa/example_17/chunk_1/pages.pdf]

# SCOUTS BSA ACTIVITIES

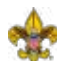

| Course | Description                                                                                                                                                                                                                                                                                                                                                                                                                                                                                           | 8:00 | 9:00 | 10:00 | 11:00 | 1:00 | 2:00 | 3:00 |
|--------|-------------------------------------------------------------------------------------------------------------------------------------------------------------------------------------------------------------------------------------------------------------------------------------------------------------------------------------------------------------------------------------------------------------------------------------------------------------------------------------------------------|------|------|-------|-------|------|------|------|
| YU-102 | <b>Discover Scuba</b><br>See previous description.                                                                                                                                                                                                                                                                                                                                                                                                                                                    |      |      |       |       |      |      |      |
| YU-103 | <b>Discover Scuba</b><br>See previous description.                                                                                                                                                                                                                                                                                                                                                                                                                                                    |      |      |       |       |      |      |      |
| YU-023 | <b>Youth Opportunities in the Order of the Arrow</b><br>Whether you are a new member or a long time member, there is always something new and exciting to do with the Order of the the Arrow.                                                                                                                                                                                                                                                                                                         |      |      |       |       |      |      |      |
| YU-067 | <b>Scout Rank &amp; Fingerprinting Merit Badge (3 hrs)</b><br>This session will help prepare you to pass the Scous BSA Rank requirements as well as completing a fun merit badge.                                                                                                                                                                                                                                                                                                                     |      |      |       |       |      |      |      |
| YU-068 | <b>Rope Skills (3 hrs)</b><br>During this session we will work on the Tenderfoot, 2nd Class and 1st Class rope and knot requirements. Complete one requirement or more. The goal is to improve your rope and knot skills.                                                                                                                                                                                                                                                                             |      |      |       |       |      |      |      |
| YU-019 | <b>Introduction to Leadership Skills for Troops (5 hrs)</b><br>Recommended for youth prior to attending NYLT. The course introduces the role of a leader and how to interact with others. Interactions and reactions are all dealt with along with ethical decisions regarding what a leader must Be, Know, and Do. Formerly known as JLT (Junior Leader Training) and the TLT (Troop Leader Training), the course evolved so that the youth are prepared to be the leaders in the "youth led" troop. |      |      |       |       |      |      |      |
| YU-086 | <b>Coin Collecting Merit Badge (3 hrs)</b><br>Coin collecting is one of the oldest of all hobbies. This elective merit badge will help to sharpen your coin collecting skills and numismatic knowledge. NOTE: Requirements 6, 7 and 9 are pre-requisites to this course. You will need to bring the coins you collected for those requirements to this session.                                                                                                                                       |      |      |       |       |      |      |      |
| YU-058 | <b>Snorkeling, BSA (3 hrs)</b><br>Provides an introduction to snorkeling, encourages the development of aquatic skills and provides a foundation for more advanced underwater activity. This is not a merit badge.<br><b>You must be a swimmer. Takes place in the pool so bring your swimsuit and towel.</b>                                                                                                                                                                                         |      |      |       |       |      |      |      |

# CS YOUTH ACTIVITIES

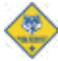

| Course | Description                                                                                                                                                                                                                                                                                                                                                                                         | 8:00 | 9:00 | 10:00 | 11:00 | 1:00 | 2:00 | 3:00 |
|--------|-----------------------------------------------------------------------------------------------------------------------------------------------------------------------------------------------------------------------------------------------------------------------------------------------------------------------------------------------------------------------------------------------------|------|------|-------|-------|------|------|------|
| YU-055 | <b>Traditional Games</b><br>Take some time to play a board game or other traditional games. This session will cover requirement #2 of the Tiger Elective Adventure: Tiger-iffic and #1 of the Lion: Rumble in the Jungle. This class is for all ages.                                                                                                                                               |      |      |       |       |      |      |      |
| YU-082 | <b>Chess Basics</b><br>For all ages, but suggested for age 10 and up. Join us to learn how to play this fun, ancient game of planning and strategy.                                                                                                                                                                                                                                                 |      |      |       |       |      |      |      |
| YU-090 | <b>Chess Basics</b><br>For all ages, but suggested for age 10 and up. Join us to learn how to play this fun, ancient game of planning and strategy.                                                                                                                                                                                                                                                 |      |      |       |       |      |      |      |
| YU-074 | <b>Traditional Games 2</b><br>Take some time to play a board game or other traditional games. This session will cover requirement #2 of the Tiger Elective Adventure: Tiger-iffic! and #1 of Lion: Rumble in the Jungle. This class is for all ages.                                                                                                                                                |      |      |       |       |      |      |      |
| YU-105 | <b>Collecting Cubs</b><br>We will complete the Wolf elective adventure “Collections and Hobbies” focusing on collections. Please bring a collection of at least 10 items or pictures of your displayed collection.                                                                                                                                                                                  |      |      |       |       |      |      |      |
| YU-097 | <b>Marble Madness (2 hrs)</b><br>Come to this session to learn about a game that has been played for thousands of years. We will cover all of the requirements for the Bear elective adventure “Marble Madness”, but will be fun for all ages. Bring your own marbles or use some of ours.                                                                                                          |      |      |       |       |      |      |      |
| YU-095 | <b>CS NOVA Award Can Code (3 hrs)</b><br>The NOVA Awards program incorporates learning with cool activities and exposure to science, technology, engineering, and mathematics. This module is designed to help Cub Scouts explore how people instruct computers and how they affect their lives. This course is not suitable for Tigers or Lion Scouts. Scouts must bring their current Cyber Chip. |      |      |       |       |      |      |      |

# CS YOUTH ACTIVITIES

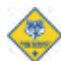

| Course | Description                                                                                                                                                                                                                                                                          | 8:00 | 9:00 | 10:00 | 11:00 | 1:00 | 2:00 | 3:00 |
|--------|--------------------------------------------------------------------------------------------------------------------------------------------------------------------------------------------------------------------------------------------------------------------------------------|------|------|-------|-------|------|------|------|
| YU-091 | <b>Movie Time</b><br>Take a break and watch a family friendly G rated movie.                                                                                                                                                                                                         |      |      |       |       |      |      |      |
| YU-107 | <b>Tiger-iffic!</b><br>Who doesn't like games? We will explore a variety of games as we complete most of the requirements for the Tiger elective adventure: Tiger-iffic! Enroll in Relay Games to complete the remaining requirement(s).                                             |      |      |       |       |      |      |      |
| YU-106 | <b>Marble Racers</b><br>Ready, set, go! Join the bears as they make marble racers.                                                                                                                                                                                                   |      |      |       |       |      |      |      |
| YU-041 | <b>Art and Tangrams</b><br>Covers all of the requirements for the Tiger elective adventure "Stories in Shapes," but anyone who would like to learn a little about art and work with tangrams is welcome to join us. This will also cover Webelos/AoL "Art Explosion" requirement #1. |      |      |       |       |      |      |      |
| YU-104 | <b>Tiger Theater</b><br>Puppets, charades and masks! Have some fun learning about theater. This will cover the Tiger elective adventure: Tiger Theater.                                                                                                                              |      |      |       |       |      |      |      |
| YU-038 | <b>Caring Cubs (2 Hrs)</b><br>This course will cover all of the requirements for the Wolf elective adventure "Cubs Who Care" and all of the requirements for the Webelos/AoL elective adventure "Aware and Care."                                                                    |      |      |       |       |      |      |      |
| YU-081 | <b>Rumble in the Jungle</b><br>Let's have some jungle fun. We will play a game and make a jungle animal mask. This will cover the Lion adventure: Rumble in the Jungle.                                                                                                              |      |      |       |       |      |      |      |
