# Supplementary material
Source: ML conference proceedings conference paper supplement (https://openreview.net/forum?id=iGDv1e4rFY)
Supplement: supplementary_material [file pages.pdf › submission/example-qa/example_18/chunk_0/pages.pdf]

## Have a Climate Conversation with friends and family

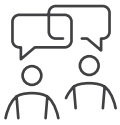

### 2. Show that solutions are desirable, possible and inevitable

- *Focus on solutions available today* - renewable energy and battery storage technology are clean, affordable and reliable climate change solutions that are available now, and continue to be rolled out here in Australia and around the world.
- *Highlight the benefits of renewables and storage* - For example, benefits include local investment and jobs, cutting household and business power bills, creating new industries, modernising the power system, improving health and supporting regional communities.
- *Show examples of the transition already underway*

#### Example:

*“In the past, we needed a balance of fossil fuels and renewables to power the country. Over the past decade, renewable technology has rapidly improved and the cost of batteries has dropped 90%, so we can now use renewables 24/7. The ACT and Tasmania are regularly powered by 100% renewable energy.”<sup>4</sup>*

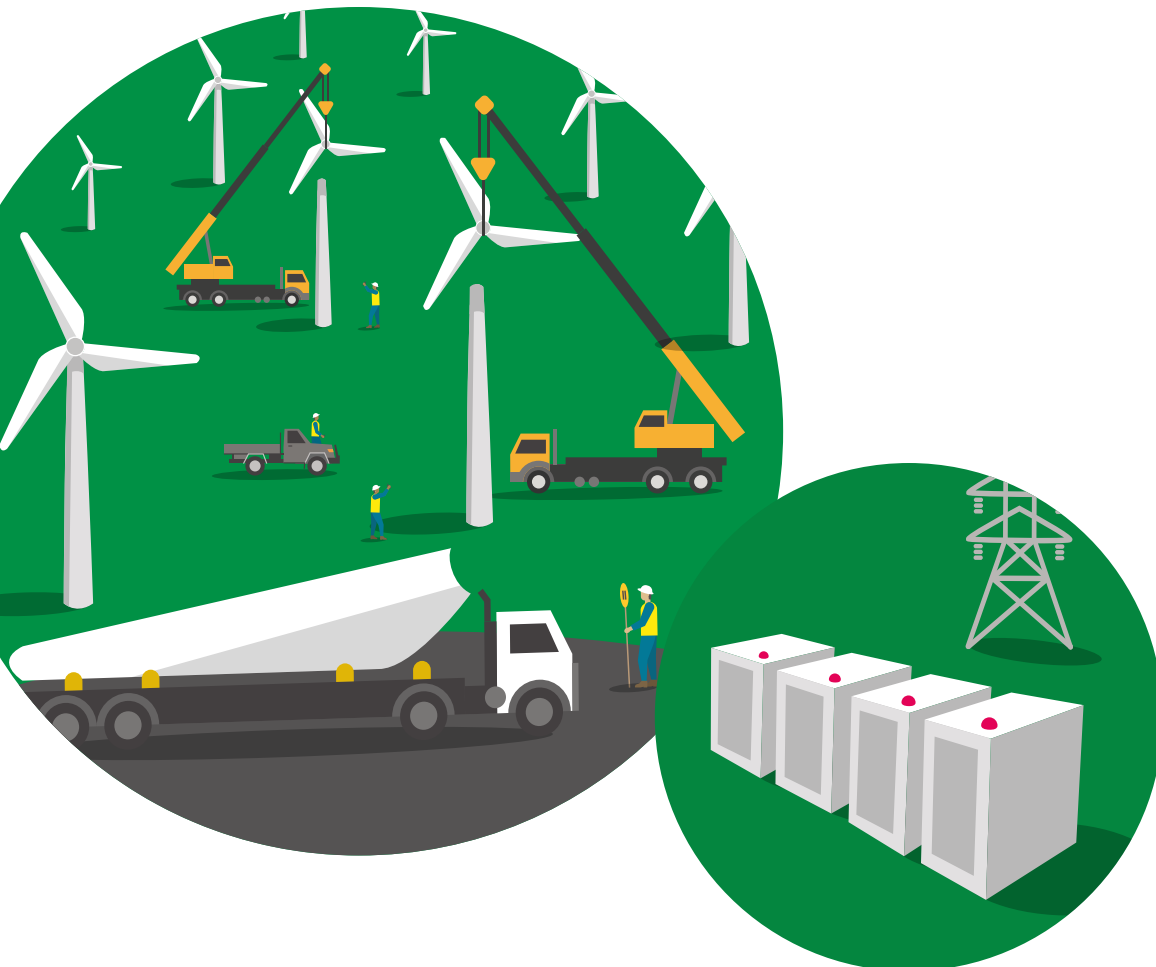

## Have a Climate Conversation with friends and family

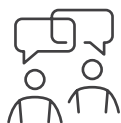

### 3. Read our conversation guides to help prepare!

Visit [climatecouncil.org.au/resources/climate-conversation-guides](https://climatecouncil.org.au/resources/climate-conversation-guides) to view these guides.

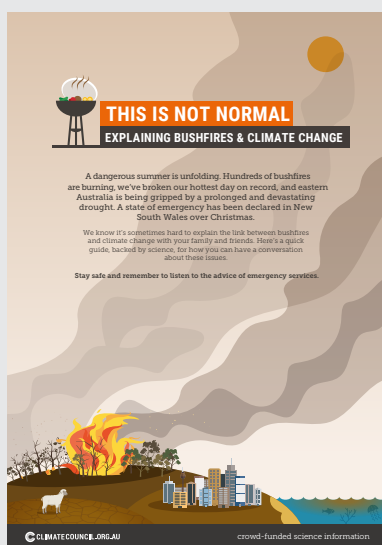

#### Bushfires & Climate Change

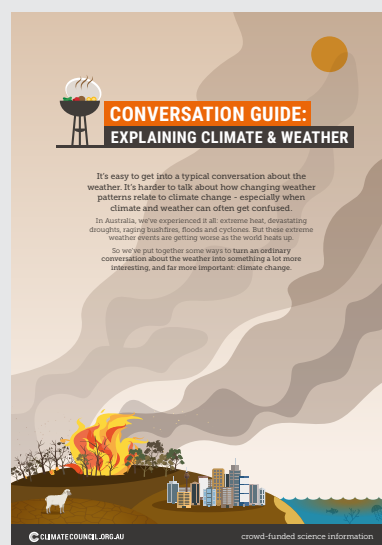

#### Explaining Climate & Weather

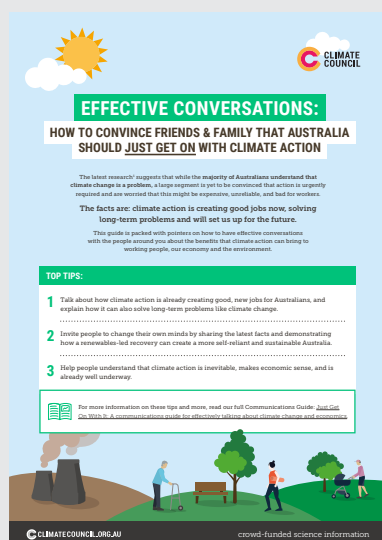

#### Effective Conversations with Family & Friends

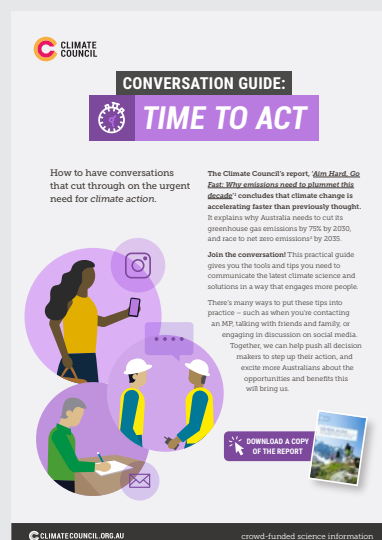

#### Time to Act
